# Supplementary material
Source: Research Square preprint supplement (doi:10.21203/rs.3.rs-9724346/v1)
Supplement: Supplementary file 1 [file 575b48ea6fa18b380dd71858.docx]

**Research insights**

**What is currently known about this topic?**

The cholesterol–HDL–glucose (CHG) index has been associated with an elevated incidence of cardiovascular disease (CVD).

Integration of biochemical markers with anthropometric measures is commonly applied to enhance predictive performance.

**What is the key research question?**

Do elevated CHG-derived obesity indices confer increased risk of CVD?

Which trajectory patterns of CHG-derived obesity indices most accurately predict CVD risk?

**What is new?**

CHG-derived obesity indices demonstrate stronger associations with CVD risk than CHG alone.

All CHG-derived obesity indices and their cumulative values were significantly associated with incident CVD, with CHG–waist circumference (CHG-WC) and CHG–Chinese visceral adiposity index (CHG-CVAI) exhibiting the strongest associations.

An increasing trajectory of CHG-CVAI was linked to higher CVD risk, whereas reductions normalised risk. In contrast, declining CHG and CHG-WC trajectories remained associated with elevated risk.

**How might this study influence clinical practice?**

Long-term monitoring of CHG and its derivatives, particularly CHG-WC and CHG-CVAI, may enhance personalised prevention strategies and risk stratification for CVD.
