# Supplementary material
Source: Research Square preprint supplement (doi:10.21203/rs.3.rs-9724346/v1)
Supplement: Supplementary file 2 [file 79754dae5d8d8382cd2c76ae.docx]

**Contents:**

**Table S1**. Missing data on baseline measurements in Cohort 1

**Table S2.** Missing data for dynamic trajectory analysis in Cohort 2

**Table S3.** Test of normality

**Table S4.** Baseline characteristics of participants according to quartiles of baseline CHG

**Table S5.** Association of baseline CHG and its obesity-related derivatives with stroke

**Table S6.** Association of cumulative levels and changing patterns of CHG and its obesity-related derivatives with stroke

**Table S7.** Association of changes in CHG and its obesity-related derivatives with CVD in males and females

**Table S8.** Association of changes in CHG and its obesity-related derivatives with CVD in middle-aged (<65 years) and elderly (≥65 years) participants

**Table S9.** Association of changes in CHG and its obesity-related derivatives with CVD in participants with and without hypertension

**Table S10.** Association of changes in CHG and its obesity-related derivatives with CVD in participants with and without kidney disease

**Table S11.** Association of changes in CHG and its obesity-related derivatives with CVD in participants with and without diabetes

**Table S12.** Association of changes in CHG and its obesity-related derivatives with CVD, stratified by drinking status

**Table S13.** Association of changes in CHG and its obesity-related derivatives with CVD, stratified by smoking status

**Table S14.** Sensitivity analysis of the associations of baseline CHG and its obesity-related derivatives with CVD using logistic regression models

**Table S15.** Sensitivity analysis of the associations of cumulative levels and changing patterns of CHG and its obesity-related derivatives with CVD using logistic regression models

**Table S16.** K-means cluster-based sensitivity analysis of the associations of CHG and its obesity-related derivatives with CVD

**Table S17.** Variance inflation factor of the adjusted covariates

**Table S18.** Sensitivity analysis of the associations of baseline CHG and its obesity-related derivatives with CVD in participants without hypertension, kidney disease, or diabetes

**Table S19.** Sensitivity analysis of the associations of cumulative levels and changing patterns of CHG and its obesity-related derivatives with CVD in participants without hypertension, kidney disease, or diabetes

**Fig. S1** Dose–response relationships of cumulative CHG and its derivatives with stroke incidence, assessed using restricted cubic splines.

**Fig. S2** Kaplan–Meier curves for stroke-free survival according to cumulative CHG and its derivatives **(A)** and trajectory groups **(B)**.

**Fig. S3** ROC curves for CVD (A) and stroke (B) risk prediction.

**Fig. S4** Cluster Analysis from 2012 to 2015.

**Table S1**. Missing data on baseline measurements in Cohort 1

| Variables | Number of Missing | Missing proportion |
| --- | --- | --- |
| DBP | 65 | 0.92% |
| SBP | 64 | 0.91% |

**Table S2.** Missing data for dynamic trajectory analysis in Cohort 2

| Variables | Number of Missing | Missing proportion |
| --- | --- | --- |
| SBP | 21 | 0.63% |
| DBP | 20 | 0.60% |

**Table S3.** Test of normality

| Kolmogorov-Smirnov | Statistic | p-value |
| --- | --- | --- |
| Age | 0.063 | <0.0001 |
| SBP | 0.068 | <0.0001 |
| DBP | 0.041 | <0.0001 |
| FBG | 0.236 | <0.0001 |
| TC | 0.043 | <0.0001 |
| HDL | 0.061 | <0.0001 |
| CRP | 0.365 | <0.0001 |
| CHG_w1 | 0.061 | <0.0001 |
| CHG_w3 | 0.052 | <0.0001 |
| CHG_bmi_w1 | 0.238 | <0.0001 |
| CHG_bmi_w3 | 0.27 | <0.0001 |
| CHG_wc_w1 | 0.048 | <0.0001 |
| CHG_wc_w3 | 0.055 | <0.0001 |
| CHG_WHtR_w1 | 0.068 | <0.0001 |
| CHG_WHtR_w3 | 0.063 | <0.0001 |
| CHG_BRI_w1 | 0.228 | <0.0001 |
| CHG_BRI_w3 | 0.128 | <0.0001 |
| CHG_CVAI_w1 | 0.086 | <0.0001 |
| CHG_CVAI_w3 | 0.136 | <0.0001 |
| CHG_WWI_w1 | 0.076 | <0.0001 |
| CHG_WWI_w3 | 0.097 | <0.0001 |
| CHG_ABSI_w1 | 0.096 | <0.0001 |
| CHG_ABSI_w3 | 0.133 | <0.0001 |
| CHG_cum | 0.054 | <0.0001 |
| CHG_bmi_cum | 0.196 | <0.0001 |
| CHG_wc_cum | 0.018 | <0.0001 |
| CHG_WHtR_cum | 0.028 | <0.0001 |
| CHG_BRI_cum | 0.132 | <0.0001 |
| CHG_CVAI_cum | 0.07 | <0.0001 |
| CHG_WWI_cum | 0.044 | <0.0001 |
| CHG_ABSI_cum | 0.07 | <0.0001 |

**Table S4.** Baseline characteristics of participants according to quartiles of baseline CHG

| Characteristic | Total | **Baseline CHG** | | | | P-value |
| --- | --- | --- | --- | --- | --- | --- |
| Q1 | Q2 | Q3 | Q4 |
| N | 7057 | 1765 | 1764 | 1764 | 1764 |  |
| Age, years | 58.00 (51.00,65.00) | 57.00 (51.00,65.00) | 58.00 (51.00,65.00) | 58.00 (52.00,64.00) | 58.00 (52.75,64.00) | 0.417 |
| Sex, n (%) |  |  |  |  |  | 0.099 |
| Male | 3324 (47.1) | 874 (49.5) | 804 (45.6) | 830 (47.1) | 816 (46.3) |  |
| Female | 3733 (52.9) | 891 (50.5) | 960 (54.4) | 934 (52.9) | 948 (53.7) |  |
| Education, n (%) | |  |  |  |  | <0.001 |
| Below high school | 4972 (70.5) | 1299 (73.6) | 1237 (70.1) | 1245 (70.6) | 1191 (67.5) |  |
| High school | 1881 (26.7) | 431 (24.4) | 476 (27.0) | 476 (27.0) | 498 (28.2) |  |
| College or above | 204 (2.9) | 35 (2.0) | 51 (2.9) | 43 (2.4) | 75 (4.3) |  |
| Residence, n (%) | |  |  |  |  | <0.001 |
| City | 1100 (15.6) | 200 (11.3) | 245 (13.9) | 290 (16.5) | 365 (20.7) |  |
| Village | 5953 (84.4) | 1564 (88.7) | 1519 (86.1) | 1472 (83.5) | 1398 (79.3) |  |
| Marital status, n (%) | |  |  |  |  | 0.264 |
| Married | 6218 (88.1) | 1553 (88.0) | 1546 (87.6) | 1545 (87.6) | 1574 (89.2) |  |
| Others | 839(11.9) | 212(12.0) | 218(12.4) | 219(12.4) | 190(10.8) |  |
| Smoking status, n (%) | |  |  |  |  | 0.106 |
| No | 4298 (60.9) | 1034 (58.6) | 1081 (61.3) | 1079 (61.2) | 1104 (62.6) |  |
| Yes | 2758 (39.1) | 730 (41.4) | 683 (38.7) | 685 (38.8) | 660 (37.4) |  |
| Drinking status, n (%) | |  |  |  |  | <0.001 |
| No | 4643 (69.6) | 1071 (65.0) | 1180 (70.8) | 1168 (69.6) | 1224 (72.7) |  |
| Yes | 2031 (30.4) | 576 (35.0) | 486 (29.2) | 509 (30.4) | 460 (27.3) |  |
| Hypertension, n (%) | |  |  |  |  | <0.001 |
| No | 5422 (77.2) | 1486 (84.6) | 1425 (81.1) | 1321 (75.1) | 1190 (67.8) |  |
| Yes | 1604 (22.8) | 271 (15.4) | 332 (18.9) | 437 (24.9) | 564 (32.2) |  |
| Kidney disease, n (%) | |  |  |  |  | 0.089 |
| No | 6692 (95.2) | 1654 (94.1) | 1682 (95.6) | 1680 (95.8) | 1676 (95.2) |  |
| Yes | 341 (4.8) | 104 (5.9) | 78 (4.4) | 74 (4.2) | 85 (4.8) |  |
| Diabetes, n (%) | |  |  |  |  | <0.001 |
| No | 6633 (94.8) | 1726 (98.8) | 1718 (97.9) | 1684 (96.3) | 1505 (86.2) |  |
| Yes | 362 (5.2) | 21 (1.2) | 36 (2.1) | 64 (3.7) | 241 (13.8) |  |
| SBP, mm Hg | 125.50 (113.50,140.50) | 122.00 (110.00,136.50) | 123.00 (112.00,138.00) | 127.00 (114.00,142.00) | 130.50 (118.00,145.00) | <0.001 |
| DBP, mm Hg | 74.00 (66.50,82.50) | 72.00 (64.50,80.50) | 72.50 (65.50,81.12) | 75.00 (67.50,83.00) | 76.50 (69.50,85.00) | <0.001 |
| FBG, mmol/L | 102.06 (94.50,111.96) | 94.68 (87.84,101.16) | 99.36 (93.60,106.20) | 103.50 (96.66,112.14) | 116.10 (104.76,142.74) | <0.001 |
| TC, mg/dL | 190.98 (168.17,216.11) | 172.81 (153.87,195.23) | 187.11 (165.85,207.60) | 196.78 (173.58,217.66) | 211.86 (186.34,241.62) | <0.001 |
| HDL-C, mg/dL | 49.87 (40.98,60.70) | 64.18 (55.67,73.84) | 53.74 (47.17,61.47) | 46.01 (40.21,52.96) | 38.27 (32.47,45.23) | <0.001 |
| hs-CRP, mg/L | 1.00 (0.54,2.10) | 0.74 (0.43,1.64) | 0.85 (0.49,1.78) | 1.07 (0.60,2.17) | 1.39 (0.76,2.88) | <0.001 |
| CHG-BMI | 121.46 (106.50,139.88) | 103.65 (94.32,114.71) | 115.87 (105.33,127.00) | 128.21 (115.88,141.92) | 145.15 (130.90,161.79) | <0.001 |
| CHG-WC | 443.42 (395.43,500.03) | 382.77 (355.13,416.02) | 424.09 (394.43,458.89) | 464.45 (427.68,504.16) | 523.93 (478.63,570.14) | <0.001 |
| CHG-WHtR | 2.81 (2.50,3.18) | 2.42 (2.25,2.64) | 2.68 (2.49,2.92) | 2.94 (2.69,3.20) | 3.30 (3.01,3.62) | <0.001 |
| CHG-BRI | 21.06 (16.18,27.42) | 16.21 (13.33,20.40) | 19.38 (15.73,24.27) | 22.92 (18.17,28.21) | 27.52 (21.83,33.37) | <0.001 |
| CHG-CVAI | 482.80 (335.44,665.23) | 316.47 (222.65,423.74) | 427.64 (322.05,545.29) | 548.38 (423.04,690.06) | 721.10 (560.61,874.20) | <0.001 |
| CHG-WWI | 58.66 (54.08,63.70) | 52.60 (49.71,55.60) | 56.70 (53.84,59.88) | 60.33 (57.37,63.40) | 66.08 (62.60,70.26) | <0.001 |
| CHG-ABSI | 0.44 (0.41,0.47) | 0.40 (0.38,0.42) | 0.42 (0.41,0.44) | 0.45 (0.43,0.47) | 0.49 (0.46,0.51) | <0.001 |
| CVD, n (%) |  |  |  |  |  | <0.001 |
| No | 5646 (80.0) | 1464 (82.9) | 1441 (81.7) | 1395 (79.1) | 1346 (76.3) |  |
| Yes | 1411 (20.0) | 301 (17.1) | 323 (18.3) | 369 (20.9) | 418 (23.7) |  |
| Stroke, n (%) |  |  |  |  |  | <0.001 |
| No | 6593 (93.4) | 1690 (95.8) | 1667 (94.5) | 1640 (93.0) | 1596 (90.5) |  |
| Yes | 464 (6.6) | 75 (4.2) | 97 (5.5) | 124 (7.0) | 168 (9.5) |  |

Values were expressed as medians (quartile interval)

HDL‐C, high‐density lipoprotein‐cholesterol; hs‐CRP, high‐sensitivity C‐reactive protein; TC, total cholesterol; CHG, the cholesterol-HDL-glucose index; CVD, cardiovascular disease; BMI: body mass index; WC: waist circumference; WHtR, waist-to-height ratio; BRI, Body Roundness Index; CVAI, Chinese Visceral Adiposity Index; WWI, Weight-Adjusted Waist Index; ABSI, A Body Shape Index

**Table S5.** Association of baseline CHG and its obesity-related derivatives with stroke

|  | **Model I** | | **Model II** | | **Model III** | |
| --- | --- | --- | --- | --- | --- | --- |
| HR (95% CI) | P | HR (95% CI) | P | HR (95% CI) | P |
| Z-CHG (Per 1 unit) | 1.34 (1.24, 1.46) | <0.001 | 1.35 (1.24, 1.46) | <0.001 | 1.31 (1.19, 1.44) | <0.001 |
| Z-CHG-BMI (Per 1 unit) | 1.35 (1.24, 1.47) | <0.001 | 1.43 (1.32, 1.56) | <0.001 | 1.33 (1.21, 1.46) | <0.001 |
| Z-CHG-WC (Per 1 unit) | 1.49 (1.36, 1.62) | <0.001 | 1.50 (1.37, 1.63) | <0.001 | 1.41 (1.28, 1.55) | <0.001 |
| Z-CHG-WHtR (Per 1 unit) | 1.47 (1.35, 1.60) | <0.001 | 1.50 (1.37, 1.64) | <0.001 | 1.40 (1.27, 1.55) | <0.001 |
| Z-CHG-BRI (Per 1 unit) | 1.42 (1.31, 1.55) | <0.001 | 1.46 (1.34, 1.59) | <0.001 | 1.35 (1.22, 1.49) | <0.001 |
| Z-CHG-CVAI (Per 1 unit) | 1.56 (1.43, 1.70) | <0.001 | 1.49 (1.37, 1.63) | <0.001 | 1.39 (1.26, 1.53) | <0.001 |
| Z-CHG-WWI (Per 1 unit) | 1.44 (1.33, 1.57) | <0.001 | 1.42 (1.30, 1.56) | <0.001 | 1.36 (1.23, 1.51) | <0.001 |
| Z-CHG-ABSI (Per 1 unit) | 1.43 (1.31, 1.55) | <0.001 | 1.36 (1.24, 1.48) | <0.001 | 1.32 (1.20, 1.46) | <0.001 |
| Quartiles of Z-CHG |  |  |  |  |  |  |
| Q1 | 1.0 |  | 1.0 |  | 1.0 |  |
| Q2 | 1.29 (0.95, 1.75) | 0.103 | 1.28 (0.94, 1.74) | 0.112 | 1.24 (0.90, 1.71) | 0.190 |
| Q3 | 1.72 (1.28, 2.30) | <0.001 | 1.71 (1.28, 2.29) | <0.001 | 1.52 (1.12, 2.07) | 0.008 |
| Q4 | 2.32 (1.76, 3.06) | <0.001 | 2.31 (1.75, 3.05) | <0.001 | 2.01 (1.49, 2.71) | <0.001 |
| Quartiles of Z-CHG-BMI |  |  |  |  |  |  |
| Q1 | 1.0 |  | 1.0 |  | 1.0 |  |
| Q2 | 1.32 (0.97, 1.80) | 0.079 | 1.47 (1.08, 2.00) | 0.015 | 1.46 (1.05, 2.03) | 0.025 |
| Q3 | 1.84 (1.37, 2.46) | <0.001 | 2.14 (1.60, 2.88) | <0.001 | 1.94 (1.42, 2.67) | <0.001 |
| Q4 | 2.31 (1.74, 3.06) | <0.001 | 2.82 (2.11, 3.75) | <0.001 | 2.32 (1.68, 3.19) | <0.001 |
| Quartiles of Z-CHG-WC |  |  |  |  |  |  |
| Q1 | 1.0 |  | 1.0 |  | 1.0 |  |
| Q2 | 1.51 (1.09, 2.09) | 0.012 | 1.55 (1.12, 2.14) | 0.008 | 1.38 (0.98, 1.94) | 0.064 |
| Q3 | 2.03 (1.49, 2.76) | <0.001 | 2.10 (1.54, 2.85) | <0.001 | 1.84 (1.33, 2.54) | <0.001 |
| Q4 | 3.02 (2.26, 4.04) | <0.001 | 3.10 (2.32, 4.15) | <0.001 | 2.51 (1.83, 3.45) | <0.001 |
| Quartiles of Z-CHG-WHtR |  |  |  |  |  |  |
| Q1 | 1.0 |  | 1.0 |  | 1.0 |  |
| Q2 | 1.67 (1.20, 2.32) | 0.002 | 1.77 (1.27, 2.45) | <0.001 | 1.67 (1.18, 2.36) | 0.004 |
| Q3 | 2.35 (1.72, 3.20) | <0.001 | 2.50 (1.83, 3.42) | <0.001 | 2.20 (1.57, 3.07) | <0.001 |
| Q4 | 3.09 (2.29, 4.18) | <0.001 | 3.36 (2.46, 4.57) | <0.001 | 2.74 (1.95, 3.84) | <0.001 |
| Quartiles of Z-CHG-BRI |  |  |  |  |  |  |
| Q1 | 1.0 |  | 1.0 |  | 1.0 |  |
| Q2 | 1.41 (1.02, 1.94) | 0.035 | 1.50 (1.09, 2.08) | 0.013 | 1.35 (0.96, 1.89) | 0.082 |
| Q3 | 2.12 (1.58, 2.86) | <0.001 | 2.33 (1.72, 3.15) | <0.001 | 2.00 (1.45, 2.75) | <0.001 |
| Q4 | 2.72 (2.04, 3.63) | <0.001 | 3.02 (2.24, 4.08) | <0.001 | 2.34 (1.69, 3.24) | <0.001 |
| Quartiles of Z-CHG-CVAI |  |  |  |  |  |  |
| Q1 | 1.0 |  | 1.0 |  | 1.0 |  |
| Q2 | 1.70 (1.21, 2.39) | 0.002 | 1.70 (1.21, 2.39) | 0.002 | 1.64 (1.14, 2.34) | 0.007 |
| Q3 | 2.45 (1.78, 3.37) | <0.001 | 2.38 (1.73, 3.29) | <0.001 | 2.18 (1.55, 3.08) | <0.001 |
| Q4 | 3.72 (2.75, 5.04) | <0.001 | 3.39 (2.49, 4.62) | <0.001 | 2.75 (1.96, 3.87) | <0.001 |
| Quartiles of Z-CHG-WWI |  |  |  |  |  |  |
| Q1 | 1.0 |  | 1.0 |  | 1.0 |  |
| Q2 | 1.73 (1.25, 2.40) | <0.001 | 1.72 (1.24, 2.39) | <0.001 | 1.68 (1.19, 2.37) | 0.003 |
| Q3 | 2.34 (1.71, 3.20) | <0.001 | 2.34 (1.70, 3.20) | <0.001 | 2.11 (1.51, 2.96) | <0.001 |
| Q4 | 3.16 (2.34, 4.27) | <0.001 | 3.07 (2.25, 4.20) | <0.001 | 2.64 (1.89, 3.71) | <0.001 |
| Quartiles of Z-CHG-ABSI |  |  |  |  |  |  |
| Q1 | 1.0 |  | 1.0 |  | 1.0 |  |
| Q2 | 1.36 (0.99, 1.87) | 0.058 | 1.29 (0.94, 1.78) | 0.116 | 1.25 (0.90, 1.74) | 0.185 |
| Q3 | 2.00 (1.49, 2.69) | <0.001 | 1.84 (1.36, 2.47) | <0.001 | 1.63 (1.19, 2.23) | 0.002 |
| Q4 | 2.72 (2.05, 3.62) | <0.001 | 2.38 (1.78, 3.18) | <0.001 | 2.06 (1.51, 2.81) | <0.001 |

HR, hazard ratio; CI, confidence interval; CHG, the cholesterol-HDL-glucose index; CVD, cardiovascular disease; BMI: body mass index; WC: waist circumference; WHtR, waist-to-height ratio; BRI, Body Roundness Index; CVAI, Chinese Visceral Adiposity Index; WWI, Weight-Adjusted Waist Index; ABSI, A Body Shape Index; Z-, variables were standardized as Z-scores (per 1 SD increase).

Model I: unadjusted

Model II: adjusted for age and sex

Model III: further adjusted for education level, residential, marital status, smoking status, drinking status, hypertension, diabetes, kidney disease, and hs-CRP

**Table S6.** Association of cumulative levels and changing patterns of CHG and its obesity-related derivatives with stroke

|  | **Model I** | | **Model II** | | **Model III** | |
| --- | --- | --- | --- | --- | --- | --- |
| HR (95% CI) | P | HR (95% CI) | P | HR (95% CI) | P |
| Z-Cumulative CHG (Per 1 unit) | 1.24 (1.08, 1.41) | 0.002 | 1.23 (1.08, 1.41) | 0.002 | 1.18 (1.01, 1.37) | 0.032 |
| Z-Cumulative CHG-BMI (Per 1 unit) | 1.22 (1.07, 1.41) | 0.004 | 1.30 (1.13, 1.49) | <0.001 | 1.21 (1.04, 1.41) | 0.016 |
| Z-Cumulative CHG-WC (Per 1 unit) | 1.40 (1.21, 1.61) | <0.001 | 1.42 (1.23, 1.64) | <0.001 | 1.32 (1.13, 1.55) | <0.001 |
| Z-Cumulative CHG-WHtR (Per 1 unit) | 1.37 (1.19, 1.58) | <0.001 | 1.39 (1.20, 1.61) | <0.001 | 1.29 (1.10, 1.51) | 0.002 |
| Z-Cumulative CHG-BRI (Per 1 unit) | 1.35 (1.18, 1.54) | <0.001 | 1.37 (1.19, 1.59) | <0.001 | 1.27 (1.09, 1.48) | 0.002 |
| Z-Cumulative CHG-CVAI (Per 1 unit) | 1.45 (1.25, 1.67) | <0.001 | 1.41 (1.21, 1.63) | <0.001 | 1.30 (1.11, 1.53) | 0.001 |
| Z-Cumulative CHG-WWI (Per 1 unit) | 1.39 (1.20, 1.62) | <0.001 | 1.36 (1.16, 1.60) | <0.001 | 1.27 (1.07, 1.50) | 0.006 |
| Z-Cumulative CHG-ABSI (Per 1 unit) | 1.41 (1.21, 1.65) | <0.001 | 1.35 (1.16, 1.58) | <0.001 | 1.27 (1.07, 1.50) | 0.005 |
| Changes in CHG |  |  |  |  |  |  |
| Stable low | 1.0 |  | 1.0 |  | 1.0 |  |
| High to low | 1.50 (1.03, 2.21) | 0.036 | 1.49 (1.01, 2.18) | 0.043 | 1.38 (0.93, 2.04) | 0.112 |
| Low to high | 0.92 (0.42, 2.01) | 0.831 | 0.84 (0.38, 1.84) | 0.661 | 0.65 (0.28, 1.50) | 0.311 |
| Stable high | 1.82 (1.29, 2.55) | <0.001 | 1.80 (1.28, 2.53) | <0.001 | 1.50 (1.05, 2.16) | 0.027 |
| Changes in CHG-BMI |  |  |  |  |  |  |
| Stable low | 1.0 |  | 1.0 |  | 1.0 |  |
| High to low | 1.83 (1.12, 3.00) | 0.016 | 2.00 (1.22, 3.28) | 0.006 | 1.83 (1.09, 3.07) | 0.022 |
| Low to high | 1.46 (0.82, 2.57) | 0.195 | 1.55 (0.88, 2.74) | 0.133 | 1.54 (0.87, 2.74) | 0.142 |
| Stable high | 1.67 (1.20, 2.33) | 0.002 | 1.89 (1.35, 2.65) | <0.001 | 1.62 (1.12, 2.33) | 0.010 |
| Changes in CHG-WC |  |  |  |  |  |  |
| Stable low | 1.0 |  | 1.0 |  | 1.0 |  |
| High to low | 2.16 (1.32, 3.53) | 0.002 | 2.23 (1.36, 3.65) | 0.001 | 2.26 (1.37, 3.72) | 0.001 |
| Low to high | 1.52 (0.83, 2.77) | 0.177 | 1.61 (0.88, 2.95) | 0.122 | 1.46 (0.78, 2.74) | 0.239 |
| Stable high | 2.59 (1.81, 3.70) | <0.001 | 2.66 (1.86, 3.81) | <0.001 | 2.29 (1.56, 3.35) | <0.001 |
| Changes in CHG-WHtR |  |  |  |  |  |  |
| Stable low | 1.0 |  | 1.0 |  | 1.0 |  |
| High to low | 2.34 (1.47, 3.73) | <0.001 | 2.35 (1.47, 3.76) | <0.001 | 2.09 (1.29, 3.41) | 0.003 |
| Low to high | 1.45 (0.80, 2.64) | 0.218 | 1.54 (0.84, 2.81) | 0.159 | 1.39 (0.74, 2.59) | 0.302 |
| Stable high | 2.11 (1.49, 2.98) | <0.001 | 2.17 (1.52, 3.11) | <0.001 | 1.84 (1.26, 2.70) | 0.002 |
| Changes in CHG-BRI |  |  |  |  |  |  |
| Stable low | 1.0 |  | 1.0 |  | 1.0 |  |
| High to low | 1.55 (0.88, 2.72) | 0.130 | 1.58 (0.90, 2.79) | 0.114 | 1.44 (0.80, 2.59) | 0.228 |
| Low to high | 1.19 (0.67, 2.12) | 0.557 | 1.30 (0.72, 2.33) | 0.383 | 1.17 (0.64, 2.14) | 0.618 |
| Stable high | 2.07 (1.48, 2.91) | <0.001 | 2.19 (1.54, 3.13) | <0.001 | 1.86 (1.27, 2.71) | 0.001 |
| Changes in CHG-CVAI |  |  |  |  |  |  |
| Stable low | 1.0 |  | 1.0 |  | 1.0 |  |
| High to low | 2.07 (1.08, 3.97) | 0.029 | 1.98 (1.03, 3.79) | 0.040 | 1.84 (0.95, 3.56) | 0.071 |
| Low to high | 1.64 (0.95, 2.82) | 0.075 | 1.68 (0.97, 2.90) | 0.063 | 1.45 (0.82, 2.56) | 0.203 |
| Stable high | 2.75 (1.90, 3.98) | <0.001 | 2.64 (1.82, 3.85) | <0.001 | 2.27 (1.53, 3.38) | <0.001 |
| Changes in CHG-WWI |  |  |  |  |  |  |
| Stable low | 1.0 |  | 1.0 |  | 1.0 |  |
| High to low | 1.43 (0.90, 2.27) | 0.132 | 1.40 (0.88, 2.22) | 0.161 | 1.27 (0.78, 2.06) | 0.335 |
| Low to high | 1.23 (0.68, 2.23) | 0.493 | 1.25 (0.69, 2.27) | 0.466 | 1.14 (0.61, 2.11) | 0.683 |
| Stable high | 2.25 (1.60, 3.18) | <0.001 | 2.19 (1.53, 3.16) | <0.001 | 1.88 (1.28, 2.77) | 0.001 |
| Changes in CHG-ABSI |  |  |  |  |  |  |
| Stable low | 1.0 |  | 1.0 |  | 1.0 |  |
| High to low | 1.59 (1.04, 2.44) | 0.033 | 1.51 (0.99, 2.32) | 0.058 | 1.41 (0.91, 2.19) | 0.127 |
| Low to high | 0.98 (0.51, 1.88) | 0.947 | 0.95 (0.49, 1.83) | 0.877 | 0.93 (0.48, 1.80) | 0.835 |
| Stable high | 2.42 (1.71, 3.43) | <0.001 | 2.22 (1.55, 3.17) | <0.001 | 1.95 (1.33, 2.85) | <0.001 |

HR, hazard ratio; CI, confidence interval; CHG, the cholesterol-HDL-glucose index; CVD, cardiovascular disease; BMI: body mass index; WC: waist circumference; WHtR, waist-to-height ratio; BRI, Body Roundness Index; CVAI, Chinese Visceral Adiposity Index; WWI, Weight-Adjusted Waist Index; ABSI, A Body Shape Index; Z-, variables were standardized as Z-scores (per 1 SD increase).

Model I: unadjusted

Model II: adjusted for age and sex

Model III: further adjusted for education level, residential, marital status, smoking status, drinking status, hypertension, diabetes, kidney disease, and hs-CRP

**Table S7.** Association of changes in CHG and its obesity-related derivatives with CVD in males and females

|  | HR (95% CI) | | P-interaction |
| --- | --- | --- | --- |
| Male | Female |
| Changes in CHG |  |  | 0.64 |
| Stable low | 1.0 | 1.0 |  |
| High to low | 1.22 (0.82, 1.80) | 1.36 (0.99, 1.88) |  |
| Low to high | 0.57 (0.23, 1.42) | 0.96 (0.55, 1.70) |  |
| Stable high | 1.45 (0.98, 2.14) | 1.23 (0.91, 1.68) |  |
| Changes in CHG-BMI |  |  | 0.67 |
| Stable low | 1.0 | 1.0 |  |
| High to low | 1.00 (0.56, 1.78) | 1.53 (1.00, 2.35) |  |
| Low to high | 1.21 (0.67, 2.19) | 1.24 (0.77, 1.99) |  |
| Stable high | 1.41 (1.00, 1.99) | 1.35 (1.01, 1.79) |  |
| Changes in CHG-WC |  |  | 0.73 |
| Stable low | 1.0 | 1.0 |  |
| High to low | 1.36 (0.82, 2.26) | 1.60 (1.08, 2.39) |  |
| Low to high | 1.13 (0.60, 2.11) | 1.54 (1.00, 2.39) |  |
| Stable high | 1.69 (1.19, 2.41) | 1.48 (1.10, 1.99) |  |
| Changes in CHG-WHtR |  |  | 0.99 |
| Stable low | 1.0 | 1.0 |  |
| High to low | 1.30 (0.81, 2.10) | 1.22 (0.78, 1.91) |  |
| Low to high | 1.21 (0.66, 2.23) | 1.31 (0.82, 2.07) |  |
| Stable high | 1.45 (1.02, 2.06) | 1.38 (1.02, 1.87) |  |
| Changes in CHG-BRI |  |  | 0.64 |
| Stable low | 1.0 | 1.0 |  |
| High to low | 0.94 (0.52, 1.71) | 1.51 (0.95, 2.40) |  |
| Low to high | 1.30 (0.77, 2.20) | 1.16 (0.73, 1.83) |  |
| Stable high | 1.41 (1.00, 1.98) | 1.39 (1.01, 1.91) |  |
| Changes in CHG-CVAI |  |  | 0.94 |
| Stable low | 1.0 | 1.0 |  |
| High to low | 1.44 (0.80, 2.58) | 1.52 (0.83, 2.79) |  |
| Low to high | 1.64 (0.99, 2.71) | 1.65 (1.10, 2.47) |  |
| Stable high | 1.81 (1.27, 2.58) | 1.58 (1.15, 2.17) |  |
| Changes in CHG-WWI |  |  | 0.95 |
| Stable low | 1.0 | 1.0 |  |
| High to low | 0.93 (0.59, 1.45) | 0.95 (0.62, 1.45) |  |
| Low to high | 1.09 (0.61, 1.96) | 1.35 (0.88, 2.08) |  |
| Stable high | 1.32 (0.91, 1.93) | 1.27 (0.92, 1.76) |  |
| Changes in CHG-ABSI |  |  | 0.99 |
| Stable low | 1.0 | 1.0 |  |
| High to low | 0.96 (0.63, 1.46) | 0.94 (0.65, 1.37) |  |
| Low to high | 1.07 (0.60, 1.90) | 1.12 (0.73, 1.72) |  |
| Stable high | 1.34 (0.91, 1.96) | 1.22 (0.89, 1.67) |  |

Note: Models adjusted for age, education level, residential, marital status, smoking status, drinking status, hypertension, diabetes, kidney disease, and hs-CRP.

**Table S8.** Association of changes in CHG and its obesity-related derivatives with CVD in middle-aged (<65 years) and elderly (≥65 years) participants

|  | HR (95% CI) | | P-interaction |
| --- | --- | --- | --- |
| 45–64 | ≥65 |
| Changes in CHG |  |  | 0.13 |
| Stable low | 1.0 | 1.0 |  |
| High to low | 1.44 (1.08, 1.91) | 1.00 (0.60, 1.66) |  |
| Low to high | 1.27 (0.76, 2.11) | 0.21 (0.05, 0.88) |  |
| Stable high | 1.39 (1.05, 1.83) | 1.05 (0.64, 1.72) |  |
| Changes in CHG-BMI |  |  | 0.15 |
| Stable low | 1.0 | 1.0 |  |
| High to low | 1.33 (0.89, 2.00) | 1.45 (0.77, 2.73) |  |
| Low to high | 1.59 (1.06, 2.38) | 0.46 (0.17, 1.28) |  |
| Stable high | 1.46 (1.13, 1.89) | 1.15 (0.74, 1.80) |  |
| Changes in CHG-WC |  |  | 0.87 |
| Stable low | 1.0 | 1.0 |  |
| High to low | 1.65 (1.16, 2.35) | 1.22 (0.62, 2.40) |  |
| Low to high | 1.53 (1.03, 2.29) | 0.91 (0.40, 2.07) |  |
| Stable high | 1.64 (1.26, 2.13) | 1.42 (0.91, 2.22) |  |
| Changes in CHG-WHtR |  |  | 0.82 |
| Stable low | 1.0 | 1.0 |  |
| High to low | 1.35 (0.94, 1.95) | 0.99 (0.48, 2.03) |  |
| Low to high | 1.29 (0.85, 1.96) | 1.24 (0.58, 2.65) |  |
| Stable high | 1.38 (1.06, 1.79) | 1.56 (0.96, 2.52) |  |
| Changes in CHG-BRI |  |  | 0.69 |
| Stable low | 1.0 | 1.0 |  |
| High to low | 1.43 (0.96, 2.15) | 0.90 (0.41, 1.96) |  |
| Low to high | 1.31 (0.89, 1.91) | 0.83 (0.36, 1.90) |  |
| Stable high | 1.41 (1.09, 1.84) | 1.40 (0.88, 2.23) |  |
| Changes in CHG-CVAI |  |  | 0.48 |
| Stable low | 1.0 | 1.0 |  |
| High to low | 1.74 (1.09, 2.77) | 0.82 (0.31, 2.16) |  |
| Low to high | 1.82 (1.29, 2.57) | 1.04 (0.48, 2.23) |  |
| Stable high | 1.80 (1.37, 2.35) | 1.32 (0.81, 2.14) |  |
| Changes in CHG-WWI |  |  | 0.44 |
| Stable low | 1.0 | 1.0 |  |
| High to low | 1.07 (0.77, 1.50) | 0.65 (0.32, 1.32) |  |
| Low to high | 1.35 (0.93, 1.97) | 0.88 (0.39, 1.99) |  |
| Stable high | 1.26 (0.96, 1.66) | 1.35 (0.80, 2.28) |  |
| Changes in CHG-ABSI |  |  | 0.72 |
| Stable low | 1.0 | 1.0 |  |
| High to low | 0.96 (0.70, 1.32) | 1.06 (0.58, 1.93) |  |
| Low to high | 1.19 (0.82, 1.72) | 0.82 (0.35, 1.92) |  |
| Stable high | 1.21 (0.92, 1.59) | 1.49 (0.89, 2.51) |  |

Note: Models adjusted for sex, education level, residential, marital status, smoking status, drinking status, hypertension, diabetes, kidney disease, and hs-CRP.

**Table S9.** Association of changes in CHG and its obesity-related derivatives with CVD in participants with and without hypertension

|  | HR (95% CI) | | P-interaction |
| --- | --- | --- | --- |
| No | Yes |
| Changes in CHG |  |  | 0.56 |
| Stable low | 1.0 | 1.0 |  |
| High to low | 1.34 (0.99, 1.80) | 1.06 (0.66, 1.68) |  |
| Low to high | 0.92 (0.53, 1.62) | 0.56 (0.22, 1.41) |  |
| Stable high | 1.23 (0.91, 1.66) | 1.16 (0.77, 1.75) |  |
| Changes in CHG-BMI |  |  | 0.50 |
| Stable low | 1.0 | 1.0 |  |
| High to low | 1.19 (0.80, 1.78) | 1.58 (0.81, 3.07) |  |
| Low to high | 1.03 (0.66, 1.61) | 1.71 (0.86, 3.39) |  |
| Stable high | 1.20 (0.92, 1.57) | 1.32 (0.84, 2.07) |  |
| Changes in CHG-WC |  |  | 0.32 |
| Stable low | 1.0 | 1.0 |  |
| High to low | 1.25 (0.86, 1.81) | 2.58 (1.38, 4.83) |  |
| Low to high | 1.25 (0.82, 1.89) | 1.72 (0.84, 3.52) |  |
| Stable high | 1.35 (1.04, 1.77) | 1.74 (1.06, 2.85) |  |
| Changes in CHG-WHtR |  |  | 0.95 |
| Stable low | 1.0 | 1.0 |  |
| High to low | 1.20 (0.82, 1.76) | 1.27 (0.67, 2.39) |  |
| Low to high | 1.30 (0.86, 1.97) | 0.94 (0.44, 2.02) |  |
| Stable high | 1.28 (0.97, 1.68) | 1.23 (0.78, 1.91) |  |
| Changes in CHG-BRI |  |  | 0.62 |
| Stable low | 1.0 | 1.0 |  |
| High to low | 1.23 (0.81, 1.86) | 1.27 (0.62, 2.61) |  |
| Low to high | 1.27 (0.87, 1.85) | 0.80 (0.36, 1.80) |  |
| Stable high | 1.20 (0.91, 1.58) | 1.30 (0.81, 2.07) |  |
| Changes in CHG-CVAI |  |  | 0.56 |
| Stable low | 1.0 | 1.0 |  |
| High to low | 1.40 (0.86, 2.28) | 1.68 (0.70, 4.05) |  |
| Low to high | 1.36 (0.94, 1.96) | 2.35 (1.18, 4.67) |  |
| Stable high | 1.43 (1.09, 1.87) | 1.95 (1.10, 3.47) |  |
| Changes in CHG-WWI |  |  | 0.49 |
| Stable low | 1.0 | 1.0 |  |
| High to low | 0.89 (0.62, 1.29) | 0.95 (0.54, 1.67) |  |
| Low to high | 1.36 (0.93, 2.01) | 0.75 (0.36, 1.59) |  |
| Stable high | 1.17 (0.87, 1.57) | 1.18 (0.76, 1.82) |  |
| Changes in CHG-ABSI |  |  | 0.56 |
| Stable low | 1.0 | 1.0 |  |
| High to low | 0.80 (0.57, 1.14) | 1.36 (0.82, 2.26) |  |
| Low to high | 1.06 (0.71, 1.59) | 1.18 (0.61, 2.26) |  |
| Stable high | 1.15 (0.86, 1.53) | 1.40 (0.89, 2.18) |  |

Note: Models adjusted for age, sex, education level, residential, marital status, smoking status, drinking status, diabetes, kidney disease, and hs-CRP.

**Table S10.** Association of changes in CHG and its obesity-related derivatives with CVD in participants with and without kidney disease

|  | HR (95% CI) | | P-interaction |
| --- | --- | --- | --- |
| No | Yes |
| Changes in CHG |  |  | 0.58 |
| Stable low | 1.0 | 1.0 |  |
| High to low | 1.28 (1.00, 1.66) | 2.25 (0.60, 8.53) |  |
| Low to high | 0.84 (0.51, 1.37) | 1.65 (0.18, 15.04) |  |
| Stable high | 1.27 (1.00, 1.63) | 2.78 (0.80, 9.62) |  |
| Changes in CHG-BMI |  |  | 0.04 |
| Stable low | 1.0 | 1.0 |  |
| High to low | 1.32 (0.93, 1.88) | 1.83 (0.41, 8.18) |  |
| Low to high | 1.10 (0.74, 1.63) | 5.50 (1.44, 21.04) |  |
| Stable high | 1.40 (1.12, 1.76) | 0.68 (0.19, 2.37) |  |
| Changes in CHG-WC |  |  | 0.27 |
| Stable low | 1.0 | 1.0 |  |
| High to low | 1.44 (1.04, 2.00) | 4.41 (1.23, 15.77) |  |
| Low to high | 1.42 (0.99, 2.04) | 1.07 (0.12, 9.92) |  |
| Stable high | 1.57 (1.25, 1.98) | 1.96 (0.59, 6.53) |  |
| Changes in CHG-WHtR |  |  | 0.71 |
| Stable low | 1.0 | 1.0 |  |
| High to low | 1.23 (0.88, 1.73) | 1.72 (0.39, 7.50) |  |
| Low to high | 1.31 (0.90, 1.90) | 0.58 (0.09, 3.56) |  |
| Stable high | 1.42 (1.13, 1.80) | 1.29 (0.39, 4.31) |  |
| Changes in CHG-BRI |  |  | 0.04 |
| Stable low | 1.0 | 1.0 |  |
| High to low | 1.18 (0.81, 1.71) | 3.78 (0.74, 19.29) |  |
| Low to high | 1.24 (0.87, 1.75) | 0.31 (0.03, 3.28) |  |
| Stable high | 1.39 (1.10, 1.75) | 1.77 (0.50, 6.19) |  |
| Changes in CHG-CVAI |  |  | 0.79 |
| Stable low | 1.0 | 1.0 |  |
| High to low | 1.41 (0.90, 2.21) | 1.67 (0.36, 7.68) |  |
| Low to high | 1.68 (1.22, 2.31) | 0.91 (0.19, 4.27) |  |
| Stable high | 1.70 (1.34, 2.16) | 1.44 (0.38, 5.47) |  |
| Changes in CHG-WWI |  |  | 0.79 |
| Stable low | 1.0 | 1.0 |  |
| High to low | 0.95 (0.70, 1.30) | 1.23 (0.28, 5.39) |  |
| Low to high | 1.24 (0.88, 1.76) | 1.24 (0.19, 7.94) |  |
| Stable high | 1.28 (1.00, 1.65) | 1.70 (0.55, 5.27) |  |
| Changes in CHG-ABSI |  |  | 0.37 |
| Stable low | 1.0 | 1.0 |  |
| High to low | 0.94 (0.70, 1.25) | 2.27 (0.61, 8.50) |  |
| Low to high | 1.10 (0.77, 1.56) | 1.46 (0.29, 7.22) |  |
| Stable high | 1.26 (0.98, 1.61) | 1.77 (0.53, 5.86) |  |

Note: Models adjusted for age, sex, education level, residential, marital status, smoking status, drinking status, hypertension, diabetes and hs-CRP.

**Table S11.** Association of changes in CHG and its obesity-related derivatives with CVD in participants with and without diabetes

|  | HR (95% CI) | | P-interaction |
| --- | --- | --- | --- |
| No | Yes |
| Changes in CHG |  |  | 0.32 |
| Stable low | 1.0 | 1.0 |  |
| High to low | 1.27 (0.98, 1.64) | 1.50 (0.48, 4.76) |  |
| Low to high | 0.82 (0.50, 1.36) | 0.70 (0.13, 3.85) |  |
| Stable high | 1.37 (1.07, 1.75) | 0.89 (0.33, 2.44) |  |
| Changes in CHG-BMI |  |  | 0.16 |
| Stable low | 1.0 | 1.0 |  |
| High to low | 1.38 (0.97, 1.97) | 0.43 (0.11, 1.67) |  |
| Low to high | 1.28 (0.88, 1.87) | 0.51 (0.10, 2.53) |  |
| Stable high | 1.45 (1.15, 1.81) | 0.55 (0.24, 1.24) |  |
| Changes in CHG-WC |  |  | 0.24 |
| Stable low | 1.0 | 1.0 |  |
| High to low | 1.47 (1.06, 2.04) | 2.13 (0.63, 7.24) |  |
| Low to high | 1.37 (0.95, 1.97) | 3.35 (0.57, 19.55) |  |
| Stable high | 1.63 (1.29, 2.05) | 1.28 (0.48, 3.45) |  |
| Changes in CHG-WHtR |  |  | 0.27 |
| Stable low | 1.0 | 1.0 |  |
| High to low | 1.21 (0.86, 1.71) | 1.49 (0.46, 4.85) |  |
| Low to high | 1.30 (0.89, 1.89) | 0.89 (0.15, 5.15) |  |
| Stable high | 1.48 (1.17, 1.87) | 0.86 (0.32, 2.33) |  |
| Changes in CHG-BRI |  |  | 0.35 |
| Stable low | 1.0 | 1.0 |  |
| High to low | 1.21 (0.83, 1.78) | 1.52 (0.45, 5.12) |  |
| Low to high | 1.21 (0.85, 1.71) | 1.31 (0.24, 7.21) |  |
| Stable high | 1.46 (1.15, 1.84) | 0.95 (0.37, 2.44) |  |
| Changes in CHG-CVAI |  |  | 0.39 |
| Stable low | 1.0 | 1.0 |  |
| High to low | 1.43 (0.91, 2.26) | 1.38 (0.40, 4.80) |  |
| Low to high | 1.70 (1.24, 2.34) | 0.55 (0.06, 4.75) |  |
| Stable high | 1.74 (1.37, 2.21) | 1.15 (0.46, 2.91) |  |
| Changes in CHG-WWI |  |  | 0.65 |
| Stable low | 1.0 | 1.0 |  |
| High to low | 0.93 (0.68, 1.27) | 1.46 (0.39, 5.46) |  |
| Low to high | 1.27 (0.90, 1.79) | 1.00 (0.11, 9.12) |  |
| Stable high | 1.32 (1.03, 1.70) | 1.29 (0.47, 3.55) |  |
| Changes in CHG-ABSI |  |  | 0.37 |
| Stable low | 1.0 | 1.0 |  |
| High to low | 0.96 (0.72, 1.28) | 1.10 (0.34, 3.59) |  |
| Low to high | 1.14 (0.80, 1.61) | 0.61 (0.12, 3.19) |  |
| Stable high | 1.33 (1.04, 1.70) | 0.89 (0.34, 2.31) |  |

Note: Models adjusted for age, sex, education level, residential, marital status, smoking status, drinking status, hypertension, kidney disease, and hs-CRP.

**Table S12.** Association of changes in CHG and its obesity-related derivatives with CVD, stratified by drinking status

|  | HR (95% CI) | | P-interaction |
| --- | --- | --- | --- |
| No | Yes |
| Changes in CHG |  |  | 0.43 |
| Stable low | 1.0 | 1.0 |  |
| High to low | 1.23 (0.92, 1.65) | 1.50 (0.93, 2.40) |  |
| Low to high | 0.86 (0.50, 1.48) | 0.72 (0.25, 2.01) |  |
| Stable high | 1.23 (0.93, 1.63) | 1.60 (0.99, 2.59) |  |
| Changes in CHG-BMI |  |  | 0.30 |
| Stable low | 1.0 | 1.0 |  |
| High to low | 1.34 (0.90, 1.98) | 1.20 (0.60, 2.37) |  |
| Low to high | 1.17 (0.76, 1.79) | 1.48 (0.72, 3.07) |  |
| Stable high | 1.25 (0.97, 1.61) | 1.72 (1.11, 2.67) |  |
| Changes in CHG-WC |  |  | 0.26 |
| Stable low | 1.0 | 1.0 |  |
| High to low | 1.37 (0.94, 1.98) | 2.01 (1.12, 3.61) |  |
| Low to high | 1.35 (0.89, 2.03) | 1.57 (0.76, 3.24) |  |
| Stable high | 1.43 (1.10, 1.85) | 2.08 (1.32, 3.28) |  |
| Changes in CHG-WHtR |  |  | 0.25 |
| Stable low | 1.0 | 1.0 |  |
| High to low | 1.04 (0.69, 1.57) | 1.77 (1.03, 3.03) |  |
| Low to high | 1.30 (0.86, 1.97) | 1.20 (0.56, 2.58) |  |
| Stable high | 1.34 (1.02, 1.74) | 1.63 (1.05, 2.53) |  |
| Changes in CHG-BRI |  |  | 0.47 |
| Stable low | 1.0 | 1.0 |  |
| High to low | 1.21 (0.78, 1.88) | 1.40 (0.76, 2.59) |  |
| Low to high | 1.23 (0.83, 1.83) | 1.06 (0.51, 2.20) |  |
| Stable high | 1.30 (0.99, 1.70) | 1.70 (1.11, 2.59) |  |
| Changes in CHG-CVAI |  |  | 0.13 |
| Stable low | 1.0 | 1.0 |  |
| High to low | 1.23 (0.70, 2.13) | 2.13 (1.08, 4.20) |  |
| Low to high | 1.59 (1.11, 2.26) | 1.80 (0.94, 3.45) |  |
| Stable high | 1.47 (1.12, 1.92) | 2.46 (1.55, 3.91) |  |
| Changes in CHG-WWI |  |  | 0.42 |
| Stable low | 1.0 | 1.0 |  |
| High to low | 0.88 (0.60, 1.27) | 1.13 (0.67, 1.90) |  |
| Low to high | 1.35 (0.91, 2.00) | 0.91 (0.44, 1.87) |  |
| Stable high | 1.25 (0.95, 1.67) | 1.45 (0.91, 2.29) |  |
| Changes in CHG-ABSI |  |  | 0.29 |
| Stable low | 1.0 | 1.0 |  |
| High to low | 0.95 (0.68, 1.32) | 1.03 (0.61, 1.74) |  |
| Low to high | 1.13 (0.77, 1.67) | 0.98 (0.47, 2.02) |  |
| Stable high | 1.17 (0.88, 1.55) | 1.72 (1.09, 2.71) |  |

Note: Models adjusted for age, sex, education level, residential, marital status, smoking status, hypertension, diabetes, kidney disease, and hs-CRP.

**Table S13.** Association of changes in CHG and its obesity-related derivatives with CVD, stratified by smoking status

|  | HR (95% CI) | | P-interaction |
| --- | --- | --- | --- |
| No | Yes |
| Changes in CHG |  |  | 0.78 |
| Stable low | 1.0 | 1.0 |  |
| High to low | 1.32 (0.98, 1.79) | 1.31 (0.85, 2.03) |  |
| Low to high | 0.73 (0.39, 1.35) | 1.13 (0.53, 2.40) |  |
| Stable high | 1.21 (0.90, 1.61) | 1.54 (0.99, 2.38) |  |
| Changes in CHG-BMI |  |  | 0.88 |
| Stable low | 1.0 | 1.0 |  |
| High to low | 1.39 (0.92, 2.10) | 1.19 (0.64, 2.22) |  |
| Low to high | 1.14 (0.71, 1.82) | 1.37 (0.75, 2.50) |  |
| Stable high | 1.34 (1.02, 1.76) | 1.42 (0.96, 2.09) |  |
| Changes in CHG-WC |  |  | 0.86 |
| Stable low | 1.0 | 1.0 |  |
| High to low | 1.65 (1.13, 2.41) | 1.31 (0.74, 2.31) |  |
| Low to high | 1.41 (0.91, 2.19) | 1.40 (0.76, 2.58) |  |
| Stable high | 1.59 (1.20, 2.10) | 1.56 (1.05, 2.31) |  |
| Changes in CHG-WHtR |  |  | 0.99 |
| Stable low | 1.0 | 1.0 |  |
| High to low | 1.21 (0.80, 1.82) | 1.43 (0.83, 2.44) |  |
| Low to high | 1.26 (0.81, 1.95) | 1.35 (0.69, 2.64) |  |
| Stable high | 1.37 (1.03, 1.83) | 1.50 (1.02, 2.22) |  |
| Changes in CHG-BRI |  |  | 0.67 |
| Stable low | 1.0 | 1.0 |  |
| High to low | 1.45 (0.94, 2.23) | 0.91 (0.45, 1.84) |  |
| Low to high | 1.17 (0.76, 1.81) | 1.35 (0.75, 2.40) |  |
| Stable high | 1.41 (1.05, 1.89) | 1.42 (0.97, 2.08) |  |
| Changes in CHG-CVAI |  |  | 0.63 |
| Stable low | 1.0 | 1.0 |  |
| High to low | 1.39 (0.80, 2.41) | 1.64 (0.86, 3.14) |  |
| Low to high | 1.41 (0.94, 2.09) | 2.20 (1.33, 3.64) |  |
| Stable high | 1.62 (1.21, 2.16) | 1.77 (1.19, 2.64) |  |
| Changes in CHG-WWI |  |  | 0.82 |
| Stable low | 1.0 | 1.0 |  |
| High to low | 0.89 (0.61, 1.31) | 1.06 (0.64, 1.76) |  |
| Low to high | 1.31 (0.87, 1.97) | 1.13 (0.59, 2.17) |  |
| Stable high | 1.19 (0.88, 1.61) | 1.57 (1.04, 2.38) |  |
| Changes in CHG-ABSI |  |  | 0.61 |
| Stable low | 1.0 | 1.0 |  |
| High to low | 0.92 (0.65, 1.30) | 1.06 (0.66, 1.70) |  |
| Low to high | 1.17 (0.79, 1.74) | 0.94 (0.47, 1.85) |  |
| Stable high | 1.14 (0.85, 1.53) | 1.62 (1.07, 2.45) |  |

Note: Models adjusted for age, sex, education level, residential, marital status, drinking status, hypertension, diabetes, kidney disease, and hs-CRP.

**Table S14.** Sensitivity analysis of the associations of baseline CHG and its obesity-related derivatives with CVD using logistic regression models

|  | **Model I** | | **Model II** | | **Model III** | |
| --- | --- | --- | --- | --- | --- | --- |
| OR (95% CI) | P | OR (95% CI) | P | OR (95% CI) | P |
| Z-CHG (Per 1 unit) | 1.17 (1.10, 1.24) | <0.001 | 1.16 (1.09, 1.23) | <0.001 | 1.09 (1.02, 1.16) | 0.013 |
| Z-CHG-BMI (Per 1 unit) | 1.27 (1.20, 1.35) | <0.001 | 1.31 (1.24, 1.39) | <0.001 | 1.21 (1.14, 1.30) | <0.001 |
| Z-CHG-WC (Per 1 unit) | 1.29 (1.22, 1.37) | <0.001 | 1.29 (1.22, 1.37) | <0.001 | 1.20 (1.12, 1.28) | <0.001 |
| Z-CHG-WHtR (Per 1 unit) | 1.32 (1.24, 1.39) | <0.001 | 1.28 (1.20, 1.36) | <0.001 | 1.18 (1.10, 1.26) | <0.001 |
| Z-CHG-BRI (Per 1 unit) | 1.31 (1.23, 1.39) | <0.001 | 1.27 (1.19, 1.35) | <0.001 | 1.16 (1.09, 1.24) | 0.012 |
| Z-CHG-CVAI (Per 1 unit) | 1.38 (1.30, 1.46) | <0.001 | 1.33 (1.25, 1.41) | <0.001 | 1.22 (1.14, 1.31) | <0.001 |
| Z-CHG-WWI (Per 1 unit) | 1.27 (1.19, 1.34) | <0.001 | 1.19 (1.12, 1.27) | <0.001 | 1.10 (1.03, 1.17) | 0.008 |
| Z-CHG-ABSI (Per 1 unit) | 1.23 (1.16, 1.31) | <0.001 | 1.16 (1.10, 1.24) | <0.001 | 1.09 (1.02, 1.17) | 0.007 |
| Quartiles of Z-CHG |  |  |  |  |  |  |
| Q1 | 1.0 |  | 1.0 |  | 1.0 |  |
| Q2 | 1.09 (0.92, 1.30) | 0.328 | 1.07 (0.90, 1.27) | 0.438 | 1.04 (0.87, 1.25) | 0.679 |
| Q3 | 1.29 (1.09, 1.52) | 0.003 | 1.28 (1.08, 1.51) | 0.005 | 1.16 (0.97, 1.39) | 0.101 |
| Q4 | 1.51 (1.28, 1.78) | <0.001 | 1.49 (1.26, 1.76) | <0.001 | 1.23 (1.03, 1.48) | 0.024 |
| Quartiles of Z-CHG-BMI |  |  |  |  |  |  |
| Q1 | 1.0 |  | 1.0 |  | 1.0 |  |
| Q2 | 1.14 (0.96, 1.36) | 0.147 | 1.21 (1.01, 1.45) | 0.038 | 1.13 (0.93, 1.36) | 0.211 |
| Q3 | 1.41 (1.19, 1.67) | <0.001 | 1.51 (1.27, 1.80) | <0.001 | 1.34 (1.11, 1.62) | 0.002 |
| Q4 | 1.83 (1.55, 2.17) | <0.001 | 2.00 (1.68, 2.37) | <0.001 | 1.56 (1.29, 1.88) | <0.001 |
| Quartiles of Z-CHG-WC |  |  |  |  |  |  |
| Q1 | 1.0 |  | 1.0 |  | 1.0 |  |
| Q2 | 1.13 (0.95, 1.35) | 0.173 | 1.15 (0.97, 1.38) | 0.114 | 1.08 (0.90, 1.31) | 0.401 |
| Q3 | 1.38 (1.16, 1.64) | <0.001 | 1.37 (1.15, 1.63) | <0.001 | 1.22 (1.01, 1.46) | 0.035 |
| Q4 | 1.91 (1.62, 2.25) | <0.001 | 1.91 (1.62, 2.26) | <0.001 | 1.51 (1.26, 1.82) | <0.001 |
| Quartiles of Z-CHG-WHtR |  |  |  |  |  |  |
| Q1 | 1.0 |  | 1.0 |  | 1.0 |  |
| Q2 | 1.28 (1.07, 1.53) | 0.006 | 1.27 (1.06, 1.52) | 0.01 | 1.17 (0.97, 1.41) | 0.108 |
| Q3 | 1.50 (1.26, 1.79) | <0.001 | 1.44 (1.20, 1.72) | <0.001 | 1.26 (1.05, 1.53) | 0.015 |
| Q4 | 2.09 (1.77, 2.47) | <0.001 | 1.93 (1.62, 2.30) | <0.001 | 1.50 (1.24, 1.81) | <0.001 |
| Quartiles of Z-CHG-BRI |  |  |  |  |  |  |
| Q1 | 1.0 |  | 1.0 |  | 1.0 |  |
| Q2 | 1.30 (1.09, 1.55) | 0.004 | 1.28 (1.07, 1.54) | 0.007 | 1.18 (0.98, 1.43) | 0.081 |
| Q3 | 1.42 (1.19, 1.69) | <0.001 | 1.37 (1.15, 1.65) | <0.001 | 1.18 (0.98, 1.43) | 0.084 |
| Q4 | 2.17 (1.83, 2.57) | <0.001 | 1.99 (1.67, 2.37) | <0.001 | 1.55 (1.28, 1.88) | <0.001 |
| Quartiles of Z-CHG-CVAI |  |  |  |  |  |  |
| Q1 | 1.0 |  | 1.0 |  | 1.0 |  |
| Q2 | 1.46 (1.22, 1.75) | <0.001 | 1.38 (1.15, 1.66) | <0.001 | 1.31 (1.08, 1.60) | 0.006 |
| Q3 | 1.75 (1.46, 2.09) | <0.001 | 1.59 (1.32, 1.90) | <0.001 | 1.42 (1.17, 1.72) | <0.001 |
| Q4 | 2.47 (2.08, 2.93) | <0.001 | 2.19 (1.84, 2.62) | <0.001 | 1.74 (1.43, 2.12) | <0.001 |
| Quartiles of Z-CHG-WWI |  |  |  |  |  |  |
| Q1 | 1.0 |  | 1.0 |  | 1.0 |  |
| Q2 | 1.20 (1.01, 1.43) | 0.042 | 1.15 (0.96, 1.37) | 0.132 | 1.10 (0.91, 1.32) | 0.338 |
| Q3 | 1.49 (1.25, 1.77) | <0.001 | 1.36 (1.15, 1.63) | <0.001 | 1.23 (1.02, 1.48) | 0.029 |
| Q4 | 1.83 (1.54, 2.16) | <0.001 | 1.54 (1.29, 1.84) | <0.001 | 1.24 (1.02, 1.50) | 0.028 |
| Quartiles of Z-CHG-ABSI |  |  |  |  |  |  |
| Q1 | 1.0 |  | 1.0 |  | 1.0 |  |
| Q2 | 1.17 (0.98, 1.39) | 0.082 | 1.12 (0.94, 1.34) | 0.193 | 1.12 (0.93, 1.35) | 0.221 |
| Q3 | 1.34 (1.13, 1.59) | <0.001 | 1.24 (1.04, 1.47) | 0.015 | 1.13 (0.94, 1.36) | 0.178 |
| Q4 | 1.68 (1.42, 1.98) | <0.001 | 1.46 (1.23, 1.73) | <0.001 | 1.22 (1.01, 1.47) | 0.036 |

OR odds ratios; CI confidence interval; CHG, the cholesterol-HDL-glucose index; CVD, cardiovascular disease; BMI: body mass index; WC: waist circumference; WHtR, waist-to-height ratio; BRI, Body Roundness Index; CVAI, Chinese Visceral Adiposity Index; WWI, Weight-Adjusted Waist Index; ABSI, A Body Shape Index; Z-, variables were standardized as Z-scores (per 1 SD increase).

Model I: unadjusted

Model II: adjusted for age and sex

Model III: further adjusted for education level, residential, marital status, smoking status, drinking status, hypertension, diabetes, kidney disease, and hs-CRP

**Table S15.** Sensitivity analysis of the associations of cumulative levels and changing patterns of CHG and its obesity-related derivatives with CVD using logistic regression models

|  | **Model I** | | **Model II** | | **Model III** | |
| --- | --- | --- | --- | --- | --- | --- |
| OR (95% CI) | P | OR (95% CI) | P | OR (95% CI) | P |
| Z-Cumulative CHG (Per 1 unit) | 1.23 (1.12, 1.36) | <0.001 | 1.22 (1.10, 1.35) | <0.001 | 1.16 (1.04, 1.29) | 0.007 |
| Z-Cumulative CHG-BMI (Per 1 unit) | 1.25 (1.14, 1.38) | <0.001 | 1.27 (1.15, 1.40) | <0.001 | 1.18 (1.06, 1.32) | 0.003 |
| Z-Cumulative CHG-WC (Per 1 unit) | 1.33 (1.20, 1.47) | <0.001 | 1.32 (1.20, 1.46) | <0.001 | 1.24 (1.11, 1.38) | <0.001 |
| Z-Cumulative CHG-WHtR (Per 1 unit) | 1.34 (1.21, 1.48) | <0.001 | 1.31 (1.18, 1.45) | <0.001 | 1.22 (1.09, 1.37) | <0.001 |
| Z-Cumulative CHG-BRI (Per 1 unit) | 1.33 (1.21, 1.47) | <0.001 | 1.31 (1.18, 1.45) | <0.001 | 1.21 (1.09, 1.35) | 0.001 |
| Z-Cumulative CHG-CVAI (Per 1 unit) | 1.39 (1.26, 1.53) | <0.001 | 1.35 (1.22, 1.50) | <0.001 | 1.26 (1.13, 1.40) | <0.001 |
| Z-Cumulative CHG-WWI (Per 1 unit) | 1.33 (1.21, 1.47) | <0.001 | 1.28 (1.15, 1.43) | <0.001 | 1.21 (1.08, 1.36) | 0.001 |
| Z-Cumulative CHG-ABSI (Per 1 unit) | 1.33 (1.20, 1.47) | <0.001 | 1.28 (1.16, 1.42) | <0.001 | 1.23 (1.10, 1.38) | <0.001 |
| Changes in CHG |  |  |  |  |  |  |
| Stable low | 1.0 |  | 1.0 |  | 1.0 |  |
| High to low | 1.39 (1.07, 1.79) | 0.012 | 1.38 (1.07, 1.79) | 0.013 | 1.34 (1.03, 1.74) | 0.031 |
| Low to high | 0.96 (0.59, 1.57) | 0.874 | 0.91 (0.56, 1.49) | 0.703 | 0.83 (0.50, 1.39) | 0.486 |
| Stable high | 1.59 (1.26, 2.00) | <0.001 | 1.54 (1.22, 1.95) | <0.001 | 1.33 (1.04, 1.70) | 0.026 |
| Changes in CHG-BMI |  |  |  |  |  |  |
| Stable low | 1.0 |  | 1.0 |  | 1.0 |  |
| High to low | 1.42 (1.00, 2.01) | 0.052 | 1.44 (1.01, 2.05) | 0.042 | 1.30 (0.90, 1.88) | 0.163 |
| Low to high | 1.30 (0.88, 1.91) | 0.187 | 1.32 (0.89, 1.95) | 0.162 | 1.26 (0.85, 1.89) | 0.250 |
| Stable high | 1.49 (1.20, 1.86) | <0.001 | 1.54 (1.23, 1.92) | <0.001 | 1.33 (1.04, 1.69) | 0.021 |
| Changes in CHG-WC |  |  |  |  |  |  |
| Stable low | 1.0 |  | 1.0 |  | 1.0 |  |
| High to low | 1.58 (1.14, 2.19) | 0.006 | 1.56 (1.12, 2.17) | 0.008 | 1.54 (1.10, 2.16) | 0.013 |
| Low to high | 1.50 (1.04, 2.16) | 0.028 | 1.51 (1.05, 2.18) | 0.026 | 1.41 (0.96, 2.06) | 0.077 |
| Stable high | 1.79 (1.43, 2.24) | <0.001 | 1.77 (1.41, 2.22) | <0.001 | 1.55 (1.21, 1.98) | <0.001 |
| Changes in CHG-WHtR |  |  |  |  |  |  |
| Stable low | 1.0 |  | 1.0 |  | 1.0 |  |
| High to low | 1.48 (1.06, 2.07) | 0.023 | 1.42 (1.01, 1.99) | 0.043 | 1.32 (0.93, 1.87) | 0.125 |
| Low to high | 1.40 (0.97, 2.03) | 0.075 | 1.36 (0.93, 1.97) | 0.112 | 1.29 (0.88, 1.91) | 0.193 |
| Stable high | 1.70 (1.37, 2.13) | <0.001 | 1.60 (1.27, 2.02) | <0.001 | 1.39 (1.09, 1.78) | 0.009 |
| Changes in CHG-BRI |  |  |  |  |  |  |
| Stable low | 1.0 |  | 1.0 |  | 1.0 |  |
| High to low | 1.38 (0.95, 2.01) | 0.089 | 1.32 (0.90, 1.92) | 0.153 | 1.25 (0.85, 1.84) | 0.264 |
| Low to high | 1.27 (0.89, 1.81) | 0.186 | 1.23 (0.86, 1.77) | 0.253 | 1.17 (0.81, 1.69) | 0.410 |
| Stable high | 1.74 (1.39, 2.17) | <0.001 | 1.63 (1.29, 2.06) | <0.001 | 1.39 (1.09, 1.79) | 0.009 |
| Changes in CHG-CVAI |  |  |  |  |  |  |
| Stable low | 1.0 |  | 1.0 |  | 1.0 |  |
| High to low | 1.62 (1.04, 2.51) | 0.033 | 1.60 (1.03, 2.49) | 0.038 | 1.50 (0.96, 2.37) | 0.077 |
| Low to high | 1.83 (1.32, 2.52) | <0.001 | 1.78 (1.29, 2.46) | <0.001 | 1.58 (1.13, 2.22) | 0.008 |
| Stable high | 2.06 (1.63, 2.60) | <0.001 | 1.92 (1.51, 2.44) | <0.001 | 1.66 (1.29, 2.14) | <0.001 |
| Changes in CHG-WWI |  |  |  |  |  |  |
| Stable low | 1.0 |  | 1.0 |  | 1.0 |  |
| High to low | 1.13 (0.83, 1.53) | 0.451 | 1.07 (0.78, 1.46) | 0.671 | 0.99 (0.72, 1.37) | 0.970 |
| Low to high | 1.42 (1.00, 2.02) | 0.047 | 1.34 (0.94, 1.91) | 0.107 | 1.24 (0.86, 1.80) | 0.243 |
| Stable high | 1.75 (1.40, 2.20) | <0.001 | 1.57 (1.24, 2.00) | <0.001 | 1.33 (1.03, 1.72) | 0.029 |
| Changes in CHG-ABSI |  |  |  |  |  |  |
| Stable low | 1.0 |  | 1.0 |  | 1.0 |  |
| High to low | 1.11 (0.83, 1.47) | 0.490 | 1.07 (0.80, 1.42) | 0.662 | 0.98 (0.73, 1.33) | 0.918 |
| Low to high | 1.20 (0.84, 1.72) | 0.307 | 1.14 (0.79, 1.63) | 0.485 | 1.09 (0.75, 1.57) | 0.657 |
| Stable high | 1.72 (1.36, 2.16) | <0.001 | 1.57 (1.23, 1.98) | <0.001 | 1.35 (1.05, 1.74) | 0.020 |

OR odds ratios; CI confidence interval; CHG, the cholesterol-HDL-glucose index; CVD, cardiovascular disease; BMI: body mass index; WC: waist circumference; WHtR, waist-to-height ratio; BRI, Body Roundness Index; CVAI, Chinese Visceral Adiposity Index; WWI, Weight-Adjusted Waist Index; ABSI, A Body Shape Index; Z-, variables were standardized as Z-scores (per 1 SD increase).

Model I: unadjusted

Model II: adjusted for age and sex

Model III: further adjusted for education level, residential, marital status, smoking status, drinking status, hypertension, diabetes, kidney disease, and hs-CRP

**Table S16.** K-means cluster-based sensitivity analysis of the associations of CHG and its obesity-related derivatives with CVD

|  | **Model I** | | **Model II** | | **Model III** | |
| --- | --- | --- | --- | --- | --- | --- |
| HR (95% CI) | P | HR (95% CI) | P | HR (95% CI) | P |
| Clusters of Z-CHG |  |  |  |  |  |  |
| Cluster 1 | 1.0 |  | 1.0 |  | 1.0 |  |
| Cluster 2 | 1.14 (0.88, 1.49) | 0.315 | 1.11 (0.85, 1.45) | 0.431 | 1.08 (0.83, 1.41) | 0.561 |
| Cluster 3 | 1.44 (1.11, 1.86) | 0.006 | 1.39 (1.08, 1.80) | 0.012 | 1.26 (0.97, 1.64) | 0.087 |
| Clusters of Z-CHG-BMI |  |  |  |  |  |  |
| Cluster 1 | 1.0 |  | 1.0 |  | 1.0 |  |
| Cluster 2 | 1.13 (0.88, 1.44) | 0.338 | 1.19 (0.93, 1.53) | 0.163 | 1.14 (0.89, 1.46) | 0.312 |
| Cluster 3 | 1.49 (1.16, 1.91) | 0.002 | 1.58 (1.22, 2.04) | <0.001 | 1.33 (1.01, 1.75) | 0.040 |
| Clusters of Z-CHG-WC |  |  |  |  |  |  |
| Cluster 1 | 1.0 |  | 1.0 |  | 1.0 |  |
| Cluster 2 | 1.30 (1.01, 1.66) | 0.039 | 1.32 (1.03, 1.69) | 0.028 | 1.29 (1.00, 1.65) | 0.047 |
| Cluster 3 | 1.58 (1.25, 2.01) | <0.001 | 1.59 (1.25, 2.02) | <0.001 | 1.40 (1.09, 1.80) | 0.009 |
| Clusters of Z-CHG-WHtR |  |  |  |  |  |  |
| Cluster 1 | 1.0 |  | 1.0 |  | 1.0 |  |
| Cluster 2 | 1.48 (1.14, 1.91) | 0.003 | 1.48 (1.14, 1.92) | 0.003 | 1.42 (1.09, 1.85) | 0.009 |
| Cluster 3 | 1.78 (1.37, 2.31) | <0.001 | 1.72 (1.31, 2.25) | <0.001 | 1.51 (1.14, 2.00) | 0.004 |
| Clusters of Z-CHG-BRI |  |  |  |  |  |  |
| Cluster 1 | 1.0 |  | 1.0 |  | 1.0 |  |
| Cluster 2 | 1.21 (0.98, 1.49) | 0.073 | 1.19 (0.96, 1.48) | 0.103 | 1.11 (0.89, 1.38) | 0.369 |
| Cluster 3 | 1.84 (1.40, 2.41) | <0.001 | 1.74 (1.31, 2.31) | <0.001 | 1.48 (1.10, 1.98) | 0.010 |
| Clusters of Z-CHG-CVAI |  |  |  |  |  |  |
| Cluster 1 | 1.0 |  | 1.0 |  | 1.0 |  |
| Cluster 2 | 1.57 (1.24, 2.00) | <0.001 | 1.50 (1.18, 1.91) | 0.001 | 1.42 (1.11, 1.81) | 0.005 |
| Cluster 3 | 2.16 (1.65, 2.83) | <0.001 | 1.99 (1.52, 2.62) | <0.001 | 1.69 (1.27, 2.26) | <0.001 |
| Clusters of Z-CHG-WWI |  |  |  |  |  |  |
| Cluster 1 | 1.0 |  | 1.0 |  | 1.0 |  |
| Cluster 2 | 1.39 (1.06, 1.82) | 0.019 | 1.36 (1.03, 1.79) | 0.029 | 1.32 (1.00, 1.73) | 0.052 |
| Cluster 3 | 1.97 (1.50, 2.58) | <0.001 | 1.82 (1.37, 2.43) | <0.001 | 1.64 (1.22, 2.20) | 0.001 |
| Clusters of Z-CHG-ABSI |  |  |  |  |  |  |
| Cluster 1 | 1.0 |  | 1.0 |  | 1.0 |  |
| Cluster 2 | 1.53 (1.20, 1.96) | <0.001 | 1.46 (1.14, 1.87) | 0.003 | 1.39 (1.08, 1.78) | 0.011 |
| Cluster 3 | 1.99 (1.48, 2.68) | <0.001 | 1.78 (1.31, 2.42) | <0.001 | 1.58 (1.15, 2.16) | 0.005 |

HR, hazard ratio; CI, confidence interval; CHG, the cholesterol-HDL-glucose index; CVD, cardiovascular disease; BMI: body mass index; WC: waist circumference; WHtR, waist-to-height ratio; BRI, Body Roundness Index; CVAI, Chinese Visceral Adiposity Index; WWI, Weight-Adjusted Waist Index; ABSI, A Body Shape Index; Z-, variables were standardized as Z-scores (per 1 SD increase).

Model I: unadjusted

Model II: adjusted for age and sex

Model III: further adjusted for education level, residential, marital status, smoking status, drinking status, hypertension, diabetes, kidney disease, and hs-CRP

**Table S17.** Variance inflation factor of the adjusted covariates

|  | GVIF | Df | GVIF^(1/(2*Df)) |
| --- | --- | --- | --- |
| CHG_cum | 1.109853 | 1 | 1.053496 |
| Age | 1.270393 | 1 | 1.127117 |
| sex | 2.303161 | 1 | 1.517617 |
| Education | 1.342309 | 2 | 1.076374 |
| Location | 1.142502 | 1 | 1.068879 |
| Marital | 1.116718 | 2 | 1.027983 |
| Drinking | 1.353555 | 1 | 1.163424 |
| Smoking | 2.072013 | 1 | 1.439449 |
| Diabetes | 1.081752 | 1 | 1.040073 |
| Hypertension | 1.064716 | 1 | 1.031851 |
| kidney | 1.004072 | 1 | 1.002034 |
| hs-CRP | 1.007387 | 1 | 1.003687 |

hs‐CRP, high‐sensitivity C‐reactive protein

**Table S18.** Sensitivity analysis of the associations of baseline CHG and its obesity-related derivatives with CVD in participants without hypertension, kidney disease, or diabetes

|  | **Model I** | | **Model II** | | **Model III** | |
| --- | --- | --- | --- | --- | --- | --- |
| HR (95% CI) | P | HR (95% CI) | P | HR (95% CI) | P |
| Z-CHG (Per 1 unit) | 1.09 (1.02, 1.17) | 0.014 | 1.09 (1.02, 1.17) | 0.016 | 1.08 (1.00, 1.16) | 0.037 |
| Z-CHG-BMI (Per 1 unit) | 1.11 (1.04, 1.19) | 0.002 | 1.17 (1.09, 1.25) | <0.001 | 1.16 (1.08, 1.25) | <0.001 |
| Z-CHG-WC (Per 1 unit) | 1.16 (1.08, 1.24) | <0.001 | 1.17 (1.09, 1.25) | <0.001 | 1.17 (1.09, 1.25) | <0.001 |
| Z-CHG-WHtR (Per 1 unit) | 1.18 (1.10, 1.26) | <0.001 | 1.14 (1.06, 1.22) | <0.001 | 1.14 (1.06, 1.22) | <0.001 |
| Z-CHG-BRI (Per 1 unit) | 1.18 (1.11, 1.26) | <0.001 | 1.14 (1.06, 1.22) | <0.001 | 1.14 (1.06, 1.22) | <0.001 |
| Z-CHG-CVAI (Per 1 unit) | 1.25 (1.17, 1.34) | <0.001 | 1.19 (1.11, 1.28) | <0.001 | 1.19 (1.10, 1.28) | <0.001 |
| Z-CHG-WWI (Per 1 unit) | 1.18 (1.10, 1.26) | <0.001 | 1.08 (1.01, 1.16) | 0.033 | 1.08 (1.00, 1.16) | 0.052 |
| Z-CHG-ABSI (Per 1 unit) | 1.16 (1.08, 1.24) | <0.001 | 1.08 (1.00, 1.15) | 0.043 | 1.07 (0.99, 1.15) | 0.073 |
| Quartiles of Z-CHG |  |  |  |  |  |  |
| Q1 | 1.0 |  | 1.0 |  | 1.0 |  |
| Q2 | 0.96 (0.78, 1.19) | 0.728 | 0.95 (0.77, 1.17) | 0.601 | 0.95 (0.76, 1.18) | 0.625 |
| Q3 | 1.33 (1.09, 1.61) | 0.005 | 1.30 (1.07, 1.58) | 0.009 | 1.28 (1.04, 1.57) | 0.018 |
| Q4 | 1.13 (0.92, 1.38) | 0.240 | 1.12 (0.91, 1.37) | 0.283 | 1.10 (0.89, 1.36) | 0.362 |
| Quartiles of Z-CHG-BMI |  |  |  |  |  |  |
| Q1 | 1.0 |  | 1.0 |  | 1.0 |  |
| Q2 | 1.13 (0.92, 1.38) | 0.261 | 1.20 (0.98, 1.48) | 0.081 | 1.18 (0.95, 1.46) | 0.138 |
| Q3 | 1.01 (0.82, 1.24) | 0.952 | 1.11 (0.90, 1.38) | 0.329 | 1.10 (0.88, 1.37) | 0.400 |
| Q4 | 1.34 (1.10, 1.64) | 0.004 | 1.53 (1.25, 1.87) | <0.001 | 1.52 (1.23, 1.88) | <0.001 |
| Quartiles of Z-CHG-WC |  |  |  |  |  |  |
| Q1 | 1.0 |  | 1.0 |  | 1.0 |  |
| Q2 | 1.08 (0.88, 1.34) | 0.458 | 1.12 (0.91, 1.39) | 0.284 | 1.09 (0.87, 1.36) | 0.459 |
| Q3 | 1.37 (1.11, 1.68) | 0.003 | 1.41 (1.15, 1.73) | 0.001 | 1.41 (1.14, 1.75) | 0.001 |
| Q4 | 1.40 (1.14, 1.72) | 0.001 | 1.44 (1.17, 1.76) | <0.001 | 1.43 (1.16, 1.77) | <0.001 |
| Quartiles of Z-CHG-WHtR |  |  |  |  |  |  |
| Q1 | 1.0 |  | 1.0 |  | 1.0 |  |
| Q2 | 1.17 (0.95, 1.46) | 0.145 | 1.16 (0.94, 1.45) | 0.170 | 1.15 (0.92, 1.43) | 0.235 |
| Q3 | 1.36 (1.11, 1.68) | 0.004 | 1.32 (1.07, 1.63) | 0.010 | 1.28 (1.03, 1.60) | 0.026 |
| Q4 | 1.53 (1.25, 1.88) | <0.001 | 1.42 (1.15, 1.75) | 0.001 | 1.38 (1.11, 1.72) | 0.003 |
| Quartiles of Z-CHG-BRI |  |  |  |  |  |  |
| Q1 | 1.0 |  | 1.0 |  | 1.0 |  |
| Q2 | 1.11 (0.90, 1.37) | 0.336 | 1.11 (0.89, 1.37) | 0.348 | 1.09 (0.87, 1.36) | 0.440 |
| Q3 | 1.26 (1.02, 1.55) | 0.029 | 1.24 (1.00, 1.53) | 0.047 | 1.22 (0.98, 1.51) | 0.074 |
| Q4 | 1.48 (1.21, 1.80) | <0.001 | 1.35 (1.09, 1.66) | 0.006 | 1.32 (1.06, 1.64) | 0.012 |
| Quartiles of Z-CHG-CVAI |  |  |  |  |  |  |
| Q1 | 1.0 |  | 1.0 |  | 1.0 |  |
| Q2 | 1.25 (1.00, 1.56) | 0.052 | 1.19 (0.95, 1.48) | 0.136 | 1.18 (0.93, 1.48) | 0.170 |
| Q3 | 1.58 (1.28, 1.95) | <0.001 | 1.43 (1.15, 1.77) | 0.001 | 1.42 (1.13, 1.78) | 0.002 |
| Q4 | 1.80 (1.46, 2.22) | <0.001 | 1.56 (1.26, 1.93) | <0.001 | 1.57 (1.25, 1.96) | <0.001 |
| Quartiles of Z-CHG-WWI |  |  |  |  |  |  |
| Q1 | 1.0 |  | 1.0 |  | 1.0 |  |
| Q2 | 1.09 (0.88, 1.35) | 0.446 | 1.02 (0.82, 1.27) | 0.845 | 1.06 (0.85, 1.33) | 0.586 |
| Q3 | 1.38 (1.12, 1.69) | 0.002 | 1.26 (1.02, 1.55) | 0.030 | 1.28 (1.03, 1.59) | 0.026 |
| Q4 | 1.52 (1.24, 1.86) | <0.001 | 1.24 (1.01, 1.54) | 0.045 | 1.24 (1.00, 1.55) | 0.054 |
| Quartiles of Z-CHG-ABSI |  |  |  |  |  |  |
| Q1 | 1.0 |  | 1.0 |  | 1.0 |  |
| Q2 | 1.14 (0.92, 1.41) | 0.241 | 1.07 (0.86, 1.33) | 0.529 | 1.10 (0.88, 1.37) | 0.425 |
| Q3 | 1.51 (1.23, 1.85) | <0.001 | 1.36 (1.10, 1.67) | 0.004 | 1.37 (1.11, 1.70) | 0.004 |
| Q4 | 1.47 (1.20, 1.80) | <0.001 | 1.23 (0.99, 1.52) | 0.058 | 1.22 (0.98, 1.52) | 0.074 |

HR, hazard ratio; CI, confidence interval; CHG, the cholesterol-HDL-glucose index; CVD, cardiovascular disease; BMI: body mass index; WC: waist circumference; WHtR, waist-to-height ratio; BRI, Body Roundness Index; CVAI, Chinese Visceral Adiposity Index; WWI, Weight-Adjusted Waist Index; ABSI, A Body Shape Index; Z-, variables were standardized as Z-scores (per 1 SD increase).

Model I: unadjusted

Model II: adjusted for age and sex

Model III: further adjusted for education level, residential, marital status, smoking status, drinking status, hypertension, diabetes, kidney disease, and hs-CRP

**Table S19.** Sensitivity analysis of the associations of cumulative levels and changing patterns of CHG and its obesity-related derivatives with CVD in participants without hypertension, kidney disease, or diabetes

|  | **Model I** | | **Model II** | | **Model III** | |
| --- | --- | --- | --- | --- | --- | --- |
| HR (95% CI) | P | HR (95% CI) | P | HR (95% CI) | P |
| Z-Cumulative CHG (Per 1 unit) | 1.13 (1.01, 1.26) | 0.030 | 1.13 (1.01, 1.26) | 0.035 | 1.13 (1.00, 1.26) | 0.043 |
| Z-Cumulative CHG-BMI (Per 1 unit) | 1.01 (0.91, 1.12) | 0.912 | 1.01 (0.92, 1.11) | 0.821 | 1.01 (0.92, 1.11) | 0.817 |
| Z-Cumulative CHG-WC (Per 1 unit) | 1.17 (1.05, 1.32) | 0.007 | 1.20 (1.07, 1.35) | 0.002 | 1.21 (1.08, 1.37) | 0.002 |
| Z-Cumulative CHG-WHtR (Per 1 unit) | 1.15 (1.03, 1.28) | 0.010 | 1.13 (1.02, 1.26) | 0.025 | 1.13 (1.02, 1.26) | 0.023 |
| Z-Cumulative CHG-BRI (Per 1 unit) | 1.06 (0.99, 1.14) | 0.092 | 1.05 (0.97, 1.13) | 0.210 | 1.05 (0.97, 1.13) | 0.231 |
| Z-Cumulative CHG-CVAI (Per 1 unit) | 1.07 (1.00, 1.15) | 0.055 | 1.05 (0.98, 1.14) | 0.170 | 1.05 (0.98, 1.13) | 0.174 |
| Z-Cumulative CHG-WWI (Per 1 unit) | 1.20 (1.06, 1.35) | 0.003 | 1.14 (1.01, 1.29) | 0.037 | 1.14 (1.01, 1.30) | 0.041 |
| Z-Cumulative CHG-ABSI (Per 1 unit) | 1.19 (1.05, 1.34) | 0.006 | 1.14 (1.01, 1.28) | 0.039 | 1.14 (1.00, 1.29) | 0.045 |
| Changes in CHG |  |  |  |  |  |  |
| Stable low | 1.0 |  | 1.0 |  | 1.0 |  |
| High to low | 1.37 (1.02, 1.84) | 0.038 | 1.36 (1.02, 1.83) | 0.039 | 1.36 (1.00, 1.84) | 0.047 |
| Low to high | 1.03 (0.58, 1.83) | 0.906 | 0.96 (0.54, 1.70) | 0.878 | 0.92 (0.51, 1.68) | 0.789 |
| Stable high | 1.48 (1.12, 1.96) | 0.006 | 1.47 (1.11, 1.95) | 0.007 | 1.44 (1.08, 1.93) | 0.013 |
| Changes in CHG-BMI |  |  |  |  |  |  |
| Stable low | 1.0 |  | 1.0 |  | 1.0 |  |
| High to low | 1.33 (0.89, 1.98) | 0.162 | 1.40 (0.94, 2.09) | 0.098 | 1.39 (0.92, 2.11) | 0.120 |
| Low to high | 0.99 (0.61, 1.58) | 0.954 | 1.03 (0.64, 1.65) | 0.915 | 1.07 (0.66, 1.72) | 0.779 |
| Stable high | 1.29 (1.00, 1.66) | 0.054 | 1.41 (1.08, 1.83) | 0.012 | 1.45 (1.11, 1.90) | 0.007 |
| Changes in CHG-WC |  |  |  |  |  |  |
| Stable low | 1.0 |  | 1.0 |  | 1.0 |  |
| High to low | 1.20 (0.81, 1.77) | 0.361 | 1.21 (0.82, 1.79) | 0.326 | 1.24 (0.84, 1.85) | 0.282 |
| Low to high | 1.36 (0.90, 2.05) | 0.139 | 1.39 (0.93, 2.10) | 0.112 | 1.38 (0.90, 2.11) | 0.140 |
| Stable high | 1.47 (1.13, 1.91) | 0.004 | 1.50 (1.15, 1.96) | 0.002 | 1.56 (1.19, 2.05) | 0.001 |
| Changes in CHG-WHtR |  |  |  |  |  |  |
| Stable low | 1.0 |  | 1.0 |  | 1.0 |  |
| High to low | 1.25 (0.84, 1.87) | 0.266 | 1.23 (0.82, 1.83) | 0.313 | 1.24 (0.82, 1.87) | 0.307 |
| Low to high | 1.48 (0.99, 2.23) | 0.059 | 1.45 (0.96, 2.20) | 0.076 | 1.50 (0.98, 2.30) | 0.061 |
| Stable high | 1.53 (1.18, 1.99) | 0.001 | 1.50 (1.14, 1.96) | 0.004 | 1.53 (1.16, 2.02) | 0.003 |
| Changes in CHG-BRI |  |  |  |  |  |  |
| Stable low | 1.0 |  | 1.0 |  | 1.0 |  |
| High to low | 1.22 (0.79, 1.89) | 0.370 | 1.19 (0.77, 1.84) | 0.438 | 1.20 (0.77, 1.88) | 0.423 |
| Low to high | 1.42 (0.98, 2.07) | 0.063 | 1.41 (0.96, 2.07) | 0.076 | 1.40 (0.94, 2.07) | 0.094 |
| Stable high | 1.41 (1.08, 1.83) | 0.010 | 1.36 (1.04, 1.80) | 0.027 | 1.39 (1.05, 1.84) | 0.023 |
| Changes in CHG-CVAI |  |  |  |  |  |  |
| Stable low | 1.0 |  | 1.0 |  | 1.0 |  |
| High to low | 1.24 (0.71, 2.18) | 0.451 | 1.22 (0.69, 2.14) | 0.494 | 1.28 (0.73, 2.26) | 0.391 |
| Low to high | 1.61 (1.13, 2.31) | 0.009 | 1.59 (1.11, 2.28) | 0.012 | 1.53 (1.05, 2.22) | 0.026 |
| Stable high | 1.72 (1.32, 2.24) | <0.001 | 1.61 (1.23, 2.11) | <0.001 | 1.62 (1.22, 2.13) | <0.001 |
| Changes in CHG-WWI |  |  |  |  |  |  |
| Stable low | 1.0 |  | 1.0 |  | 1.0 |  |
| High to low | 1.04 (0.72, 1.50) | 0.827 | 0.99 (0.68, 1.43) | 0.942 | 0.98 (0.67, 1.42) | 0.902 |
| Low to high | 1.73 (1.19, 2.51) | 0.004 | 1.62 (1.10, 2.37) | 0.013 | 1.60 (1.08, 2.36) | 0.020 |
| Stable high | 1.60 (1.22, 2.09) | <0.001 | 1.45 (1.09, 1.93) | 0.012 | 1.42 (1.06, 1.91) | 0.019 |
| Changes in CHG-ABSI |  |  |  |  |  |  |
| Stable low | 1.0 |  | 1.0 |  | 1.0 |  |
| High to low | 0.90 (0.64, 1.28) | 0.566 | 0.85 (0.60, 1.21) | 0.377 | 0.83 (0.58, 1.19) | 0.306 |
| Low to high | 1.27 (0.85, 1.91) | 0.248 | 1.19 (0.79, 1.79) | 0.410 | 1.19 (0.79, 1.81) | 0.399 |
| Stable high | 1.57 (1.20, 2.05) | 0.001 | 1.41 (1.07, 1.86) | 0.015 | 1.37 (1.03, 1.82) | 0.030 |

HR, hazard ratio; CI, confidence interval; CHG, the cholesterol-HDL-glucose index; CVD, cardiovascular disease; BMI: body mass index; WC: waist circumference; WHtR, waist-to-height ratio; BRI, Body Roundness Index; CVAI, Chinese Visceral Adiposity Index; WWI, Weight-Adjusted Waist Index; ABSI, A Body Shape Index; Z-, variables were standardized as Z-scores (per 1 SD increase).

Model I: unadjusted

Model II: adjusted for age and sex

Model III: further adjusted for education level, residential, marital status, smoking status, drinking status, hypertension, diabetes, kidney disease, and hs-CRP


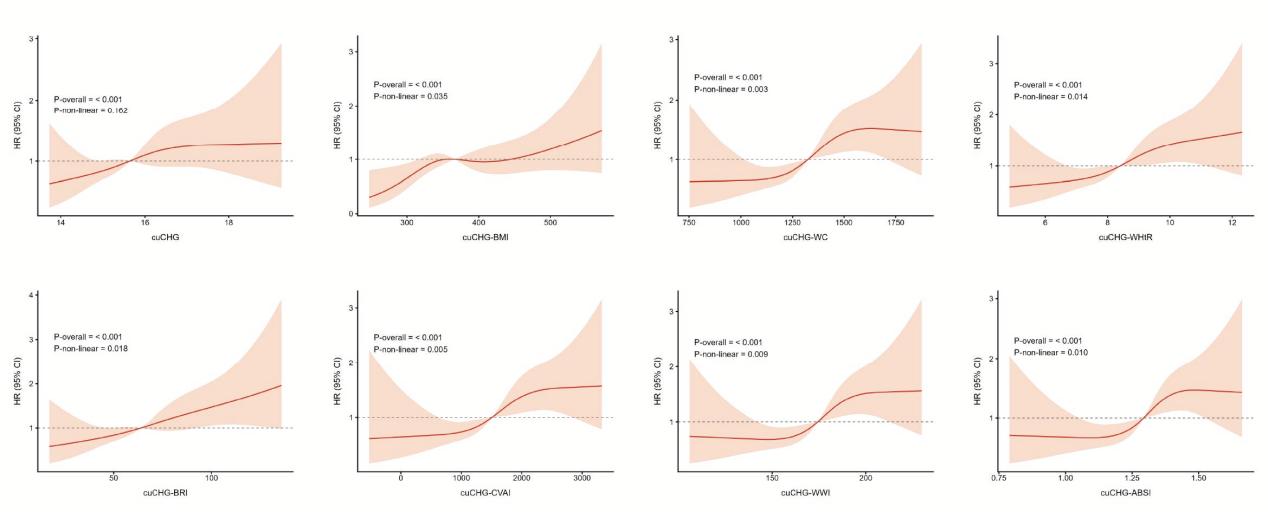


**Fig. S1** Dose–response relationships of cumulative CHG and its derivatives with stroke incidence, assessed using restricted cubic splines. Models were adjusted for age, sex, education level, residence, marital status, smoking status, drinking status, hypertension, diabetes, kidney disease, and high-sensitivity C-reactive protein (hs-CRP). CHG: cholesterol–HDL–glucose; BMI: body mass index; WC: waist circumference; WHtR: waist-to-height ratio; BRI: body roundness index; CVAI: Chinese visceral adiposity index; WWI: weight-adjusted waist index; ABSI: a body shape index.


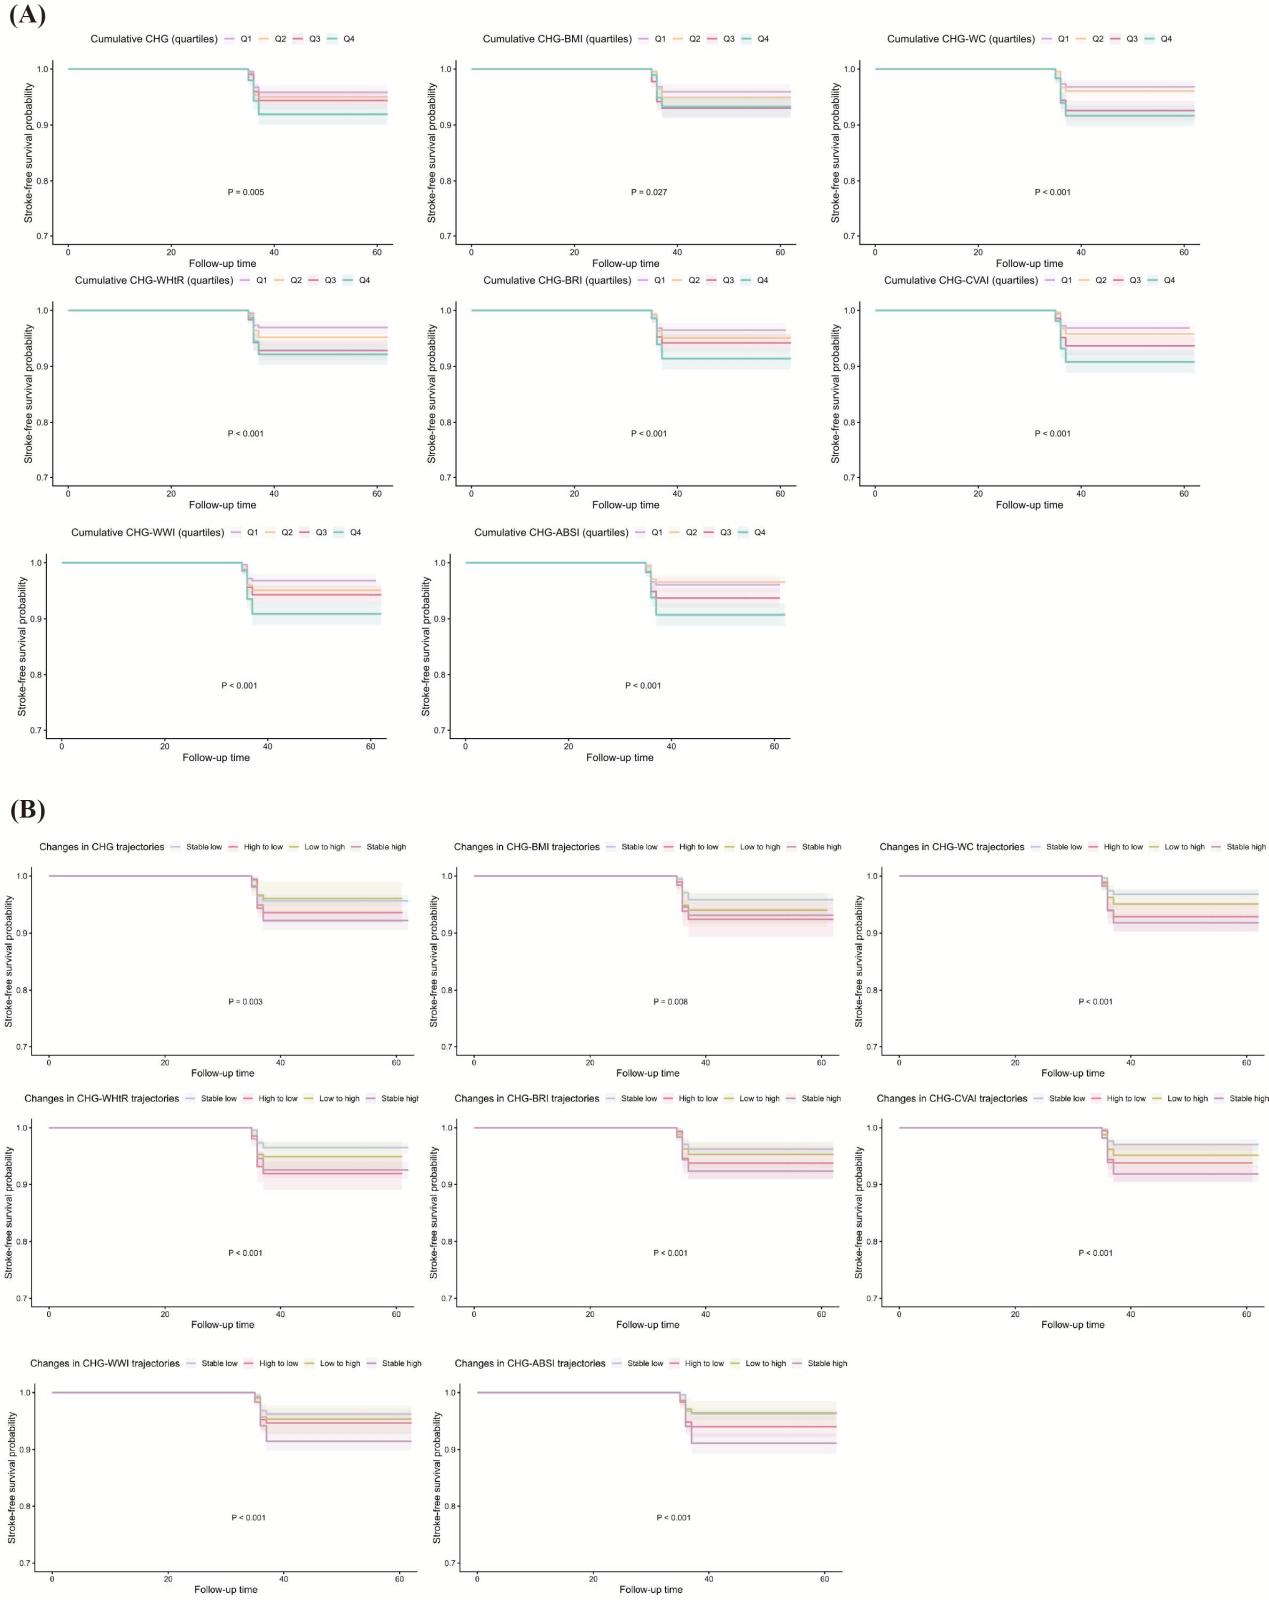


**Fig. S2** Kaplan–Meier curves for stroke-free survival according to cumulative CHG and its derivatives **(A)** and trajectory groups **(B)**. CHG: cholesterol–HDL–glucose; BMI: body mass index; WC: waist circumference; WHtR: waist-to-height ratio; BRI: body roundness index; CVAI: Chinese visceral adiposity index; WWI: weight-adjusted waist index; ABSI: a body shape index.


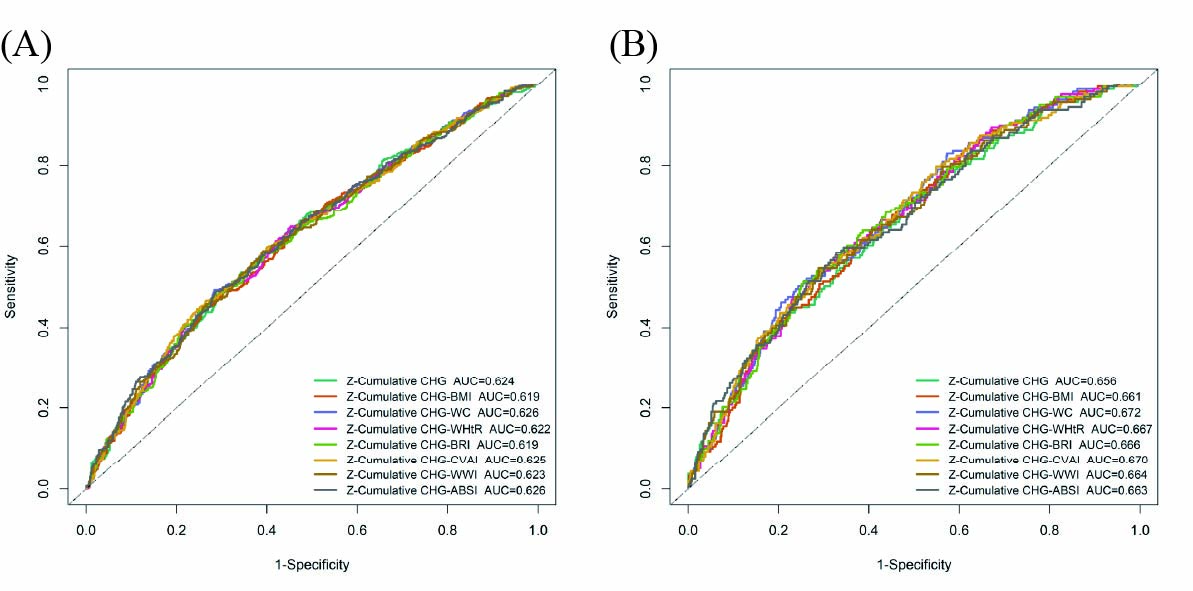


**Fig. S3** ROC curves for CVD (A) and stroke (B) risk prediction. CHG: cholesterol–HDL–glucose; BMI: body mass index; WC: waist circumference; WHtR: waist-to-height ratio; BRI: body roundness index; CVAI: Chinese visceral adiposity index; WWI: weight-adjusted waist index; ABSI: a body shape index.


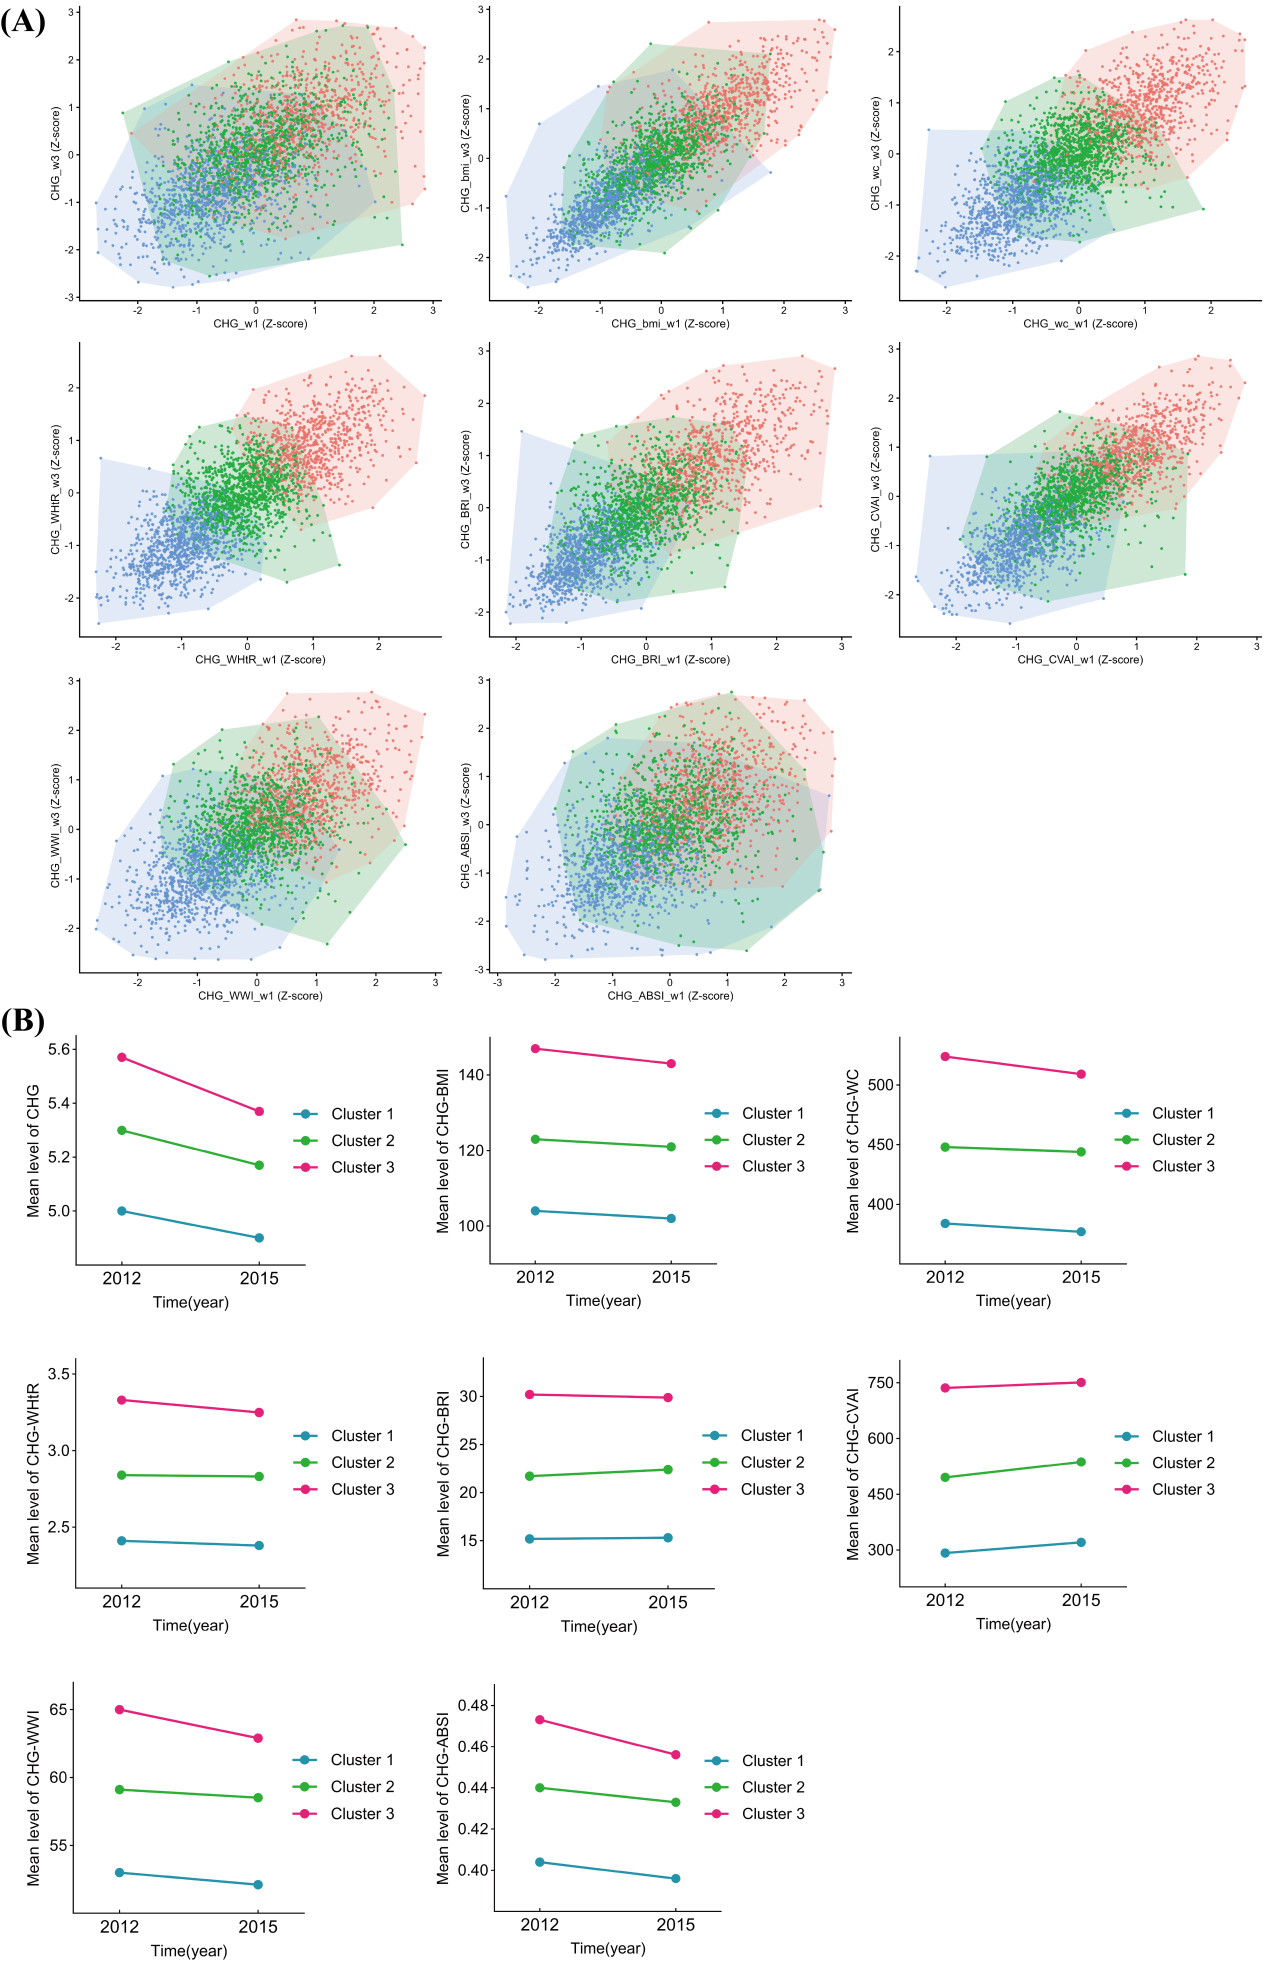


**Fig. S4** Cluster Analysis from 2012 to 2015. (A) Three clusters were identified by the K-means method based on Euclidean distance. (B) Changes from 2012 to 2015. CHG: cholesterol–HDL–glucose; BMI: body mass index; WC: waist circumference; WHtR: waist-to-height ratio; BRI: body roundness index; CVAI: Chinese visceral adiposity index; WWI: weight-adjusted waist index; ABSI: a body shape index.
